# Supplementary material for: Interaction of gas phase oxalic acid with ammonia and its atmospheric implications
Source: Royal Society of Chemistry journal article supplement (doi:10.1039/c5cp00027k), 2015-01-01
Supplement: c5cp00027k1.pdf [file c5cp00027k1.pdf]

## Supporting Information

### Interaction of Gas Phase Oxalic Acid with Ammonia and Its Atmospheric Implication

Xiu-Qiu Peng,<sup>1</sup> Yi-Rong Liu,<sup>1</sup> Teng Huang,<sup>1</sup> Shuai Jiang,<sup>1</sup> Wei Huang<sup>1,2\*</sup>

*<sup>1</sup>Laboratory of Atmospheric Physico-Chemistry, Anhui Institute of Optics & Fine Mechanics, Chinese Academy of Sciences, Hefei, Anhui 230031, China*

*<sup>2</sup>School of Environmental Science & Optoelectronic Technology, University of Science and Technology of China, Hefei, Anhui 230026, China*

**Figure S1.** Isomers with ammonia binding to either carboxyl and with the relative single point energy above 6 kcal mol<sup>-1</sup>.

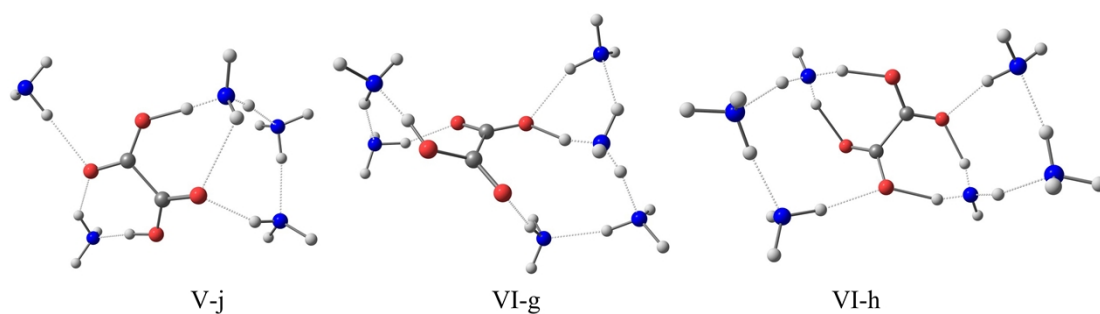

**Table S1.** Binding energy of isomers with ammonia binding to either carboxyl and with the relative single point energy above 6 kcal mol<sup>-1</sup>.

| n | isomer | E        | $\Delta E_{rel}$ | H            | G            | $\Delta G$ |
|---|--------|----------|------------------|--------------|--------------|------------|
| 5 | V -a   | -660.430 | 0                | -660.1775255 | -660.2521165 | 0.522      |
|   | V -j   | -660.413 | 8.661            | -660.1632545 | -660.2408555 | 7.588      |
| 6 | VI-a   | -716.927 | 0                | -716.6358561 | -716.7157521 | 3.495      |
|   | VI-g   | -716.916 | 6.103            | -716.6256369 | -716.7076059 | 8.607      |
|   | VI-h   | -716.915 | 7.573            | -716.6246076 | -716.7014876 | 12.446     |

**Data S1:** The coordinates of (H<sub>2</sub>C<sub>2</sub>O<sub>4</sub>)(NH<sub>3</sub>)<sub>n</sub> (n=1~6) isomers

**(H<sub>2</sub>C<sub>2</sub>O<sub>4</sub>)(NH<sub>3</sub>)<sub>1</sub>**

Isomer I -a

|   |           |           |            |
|---|-----------|-----------|------------|
| C | -0.639276 | -0.754418 | 0.000033   |
| C | -0.537555 | 0.807113  | 0.000052   |
| O | -1.917020 | -1.128235 | 0.000028   |
| O | 0.294250  | -1.527973 | 0.000062   |
| O | -1.599962 | 1.418935  | -0.000325  |
| O | 0.639807  | 1.362387  | 0.000382   |
| H | -2.410290 | -0.263538 | 0.000047   |
| H | 1.486658  | 0.713407  | 0.000436   |
| N | 2.786220  | -0.104510 | -0.000208` |

|   |          |           |           |
|---|----------|-----------|-----------|
| H | 3.375442 | 0.007399  | -0.824546 |
| H | 3.374968 | 0.006350  | 0.824625  |
| H | 2.394060 | -1.049134 | -0.000795 |

**(H<sub>2</sub>C<sub>2</sub>O<sub>4</sub>)(NH<sub>3</sub>)<sub>2</sub>**

Isomer II -a

|   |           |           |           |
|---|-----------|-----------|-----------|
| C | 0.817538  | -0.756859 | -0.281213 |
| C | 1.296493  | 0.656309  | 0.203889  |
| O | 1.822969  | -1.624668 | -0.227260 |
| O | -0.308784 | -1.039386 | -0.650364 |
| O | 2.491472  | 0.694426  | 0.535703  |
| O | 0.447200  | 1.607468  | 0.223139  |
| H | 2.565717  | -1.039673 | 0.116485  |
| H | -0.777185 | 1.430010  | -0.187861 |
| N | -2.983417 | -0.969069 | 0.704320  |
| H | -2.155331 | -1.459731 | 0.351731  |
| H | -2.961408 | -1.032591 | 1.722281  |
| H | -3.805451 | -1.486074 | 0.392845  |
| N | -1.929876 | 1.396792  | -0.556541 |
| H | -2.402571 | 2.287156  | -0.397773 |
| H | -1.939430 | 1.191721  | -1.556182 |
| H | -2.438329 | 0.615704  | -0.061775 |

Isomer II -b

|   |           |           |           |
|---|-----------|-----------|-----------|
| C | -0.127577 | 0.832002  | 0.000237  |
| C | -0.093779 | -0.730515 | 0.000238  |
| O | 1.098075  | 1.353123  | 0.000072  |
| O | -1.135934 | 1.505352  | 0.000352  |
| O | 1.005043  | -1.271242 | -0.000075 |
| O | -1.228699 | -1.370425 | 0.000659  |
| H | 1.732820  | 0.589146  | -0.000048 |
| H | -2.124010 | -0.792893 | 0.000225  |
| N | 4.063418  | -0.220193 | -0.000379 |
| H | 4.005503  | 0.373746  | -0.825597 |
| H | 4.002415  | 0.368658  | 0.828258  |
| H | 3.279268  | -0.872727 | -0.003770 |
| N | -3.505970 | -0.110558 | -0.000626 |
| H | -3.216026 | 0.869791  | 0.000336  |
| H | -4.079624 | -0.281407 | -0.825927 |
| H | -4.082227 | -0.282437 | 0.822636  |

**(H<sub>2</sub>C<sub>2</sub>O<sub>4</sub>)(NH<sub>3</sub>)<sub>3</sub>**

## Isomers III -a

|   |           |           |           |
|---|-----------|-----------|-----------|
| C | 1.624186  | 0.469353  | 0.077415  |
| C | 1.135100  | -1.023775 | 0.062415  |
| O | 2.925484  | 0.530150  | -0.192369 |
| O | 0.926063  | 1.444828  | 0.293385  |
| O | 2.039058  | -1.837197 | -0.213052 |
| O | -0.086934 | -1.238029 | 0.314046  |
| H | 3.134016  | -0.448213 | -0.316013 |
| H | -1.085537 | -0.119157 | 0.653699  |
| N | -2.046624 | 0.395231  | 0.774240  |
| H | -2.256277 | 0.529993  | 1.763083  |
| H | -2.018045 | 1.331384  | 0.281176  |
| H | -2.720096 | -0.283724 | 0.348266  |
| N | -2.936097 | -2.039072 | -0.461508 |
| H | -3.421180 | -2.799453 | 0.015230  |
| H | -3.164256 | -2.126154 | -1.452068 |
| H | -1.928113 | -2.217886 | -0.368028 |
| N | -1.529174 | 2.894852  | -0.513774 |
| H | -1.734169 | 3.797799  | -0.086191 |
| H | -1.677631 | 3.003549  | -1.517054 |
| H | -0.530526 | 2.703294  | -0.369868 |

## Isomer III -b

|   |           |           |           |
|---|-----------|-----------|-----------|
| C | -1.570061 | 0.002309  | 0.738034  |
| C | -1.068843 | -0.001214 | -0.757295 |
| O | -0.713665 | 0.004387  | 1.663134  |
| O | -2.818386 | 0.002417  | 0.813054  |
| O | 0.096610  | -0.002142 | -1.132386 |
| O | -2.108807 | -0.003489 | -1.578132 |
| H | 0.762766  | 0.003314  | 1.451311  |
| H | -2.862793 | -0.001892 | -0.894410 |
| N | 2.161455  | -2.184136 | -0.501478 |
| H | 2.956081  | -2.381925 | -1.109310 |
| H | 1.456222  | -1.694429 | -1.062336 |
| H | 1.760558  | -3.084224 | -0.236508 |
| N | 1.865852  | 0.002358  | 1.355266  |
| H | 2.139691  | 0.853968  | 0.801000  |
| H | 2.311185  | 0.003893  | 2.272537  |
| H | 2.138492  | -0.851838 | 0.804403  |
| N | 2.164456  | 2.180581  | -0.510604 |
| H | 1.765540  | 3.082937  | -0.250430 |
| H | 1.458044  | 1.689231  | -1.068564 |

H 2.959279 2.373386 -1.119780

Isomer III -c

C -1.856086 -0.581459 -0.237764  
C -1.181468 0.725053 0.332600  
O -3.059159 -0.293305 -0.724952  
O -1.371563 -1.700339 -0.258233  
O -1.875088 1.746474 0.173555  
O -0.034021 0.627268 0.869830  
H -3.101510 0.698045 -0.555854  
H 0.677164 -0.670233 0.928958  
N 3.448086 -0.824573 -0.668726  
H 3.455582 -1.070354 -1.659370  
H 3.233791 0.193138 -0.600629  
H 4.400244 -0.963288 -0.328976  
N 2.432239 1.997906 -0.251039  
H 2.214022 2.549868 -1.081617  
H 1.530750 1.767199 0.189395  
H 2.916840 2.630250 0.386940  
N 1.205579 -1.642279 0.827554  
H 1.412703 -2.063522 1.732464  
H 0.505068 -2.204625 0.325759  
H 2.098005 -1.486204 0.257787

Isomer III -d

C 1.856051 -0.581513 -0.237679  
C 1.181445 0.725094 0.332544  
O 3.059044 -0.293361 -0.725028  
O 1.371578 -1.700420 -0.257903  
O 1.875043 1.746484 0.173222  
O 0.034073 0.627347 0.869928  
H 3.101294 0.698015 -0.556098  
H -0.677294 -0.670163 0.929125  
N -3.447895 -0.824545 -0.669069  
H -3.455140 -1.070288 -1.659723  
H -4.400137 -0.963273 -0.329563  
H -3.233595 0.193166 -0.600878  
N -2.432155 1.997785 -0.250796  
H -2.916627 2.629896 0.387511  
H -1.530542 1.766982 0.189350  
H -2.214180 2.550031 -1.081249  
N -1.205727 -1.642146 0.827635  
H -1.413005 -2.063364 1.732519  
H -2.098074 -1.486028 0.257714

H -0.505140 -2.204516 0.325966

Isomer III -e

C -1.134953 -1.023931 0.062129  
C -1.624256 0.469063 0.077512  
O 0.087150 -1.238058 0.313541  
O -2.038798 -1.837485 -0.213271  
O -0.926270 1.444616 0.293503  
O -2.925639 0.529753 -0.191980  
H 1.085458 -0.119150 0.653467  
H -3.134119 -0.448586 -0.315762  
N 2.936828 -2.038582 -0.461156  
H 1.928848 -2.217623 -0.368091  
H 3.165444 -2.125838 -1.451600  
H 3.421852 -2.798780 0.015944  
N 1.528606 2.895047 -0.513941  
H 0.529973 2.703444 -0.369952  
H 1.733477 3.798262 -0.086850  
H 1.676996 3.003283 -1.517289  
N 2.046333 0.395603 0.774351  
H 2.255576 0.530484 1.763269  
H 2.017636 1.331722 0.281243  
H 2.720213 -0.283090 0.348659

Isomer III -f

C 0.709327 1.019785 0.065218  
C 0.304665 -0.435546 0.471464  
O -0.274474 1.832954 -0.202527  
O 1.889244 1.348474 0.026623  
O -0.810311 -0.666303 0.915734  
O 1.213098 -1.375923 0.320111  
H -1.299713 1.466169 -0.141957  
H 2.150478 -1.077174 -0.027951  
N -2.777221 1.263202 -0.125667  
H -3.037490 0.289046 -0.373566  
H -3.297062 1.905294 -0.724339  
H -3.088572 1.418211 0.833677  
N 3.663307 -0.786181 -0.493232  
H 4.398659 -1.114659 0.131198  
H 3.939527 -1.007390 -1.448737  
H 3.578416 0.230102 -0.400343  
N -3.206185 -1.698216 -0.538946  
H -3.945023 -2.215400 -0.062600  
H -2.359252 -1.776418 0.034506

H -3.023685 -2.188471 -1.414593

**(H<sub>2</sub>C<sub>2</sub>O<sub>4</sub>)(NH<sub>3</sub>)<sub>4</sub>**

Isomer IV -a

C 1.718357 -0.341253 0.000075  
C 1.281676 1.173770 0.001022  
O 3.042190 -0.429997 -0.001350  
O 0.969727 -1.308808 0.000471  
O 2.260810 1.951475 0.000292  
O 0.047455 1.428654 0.002361  
H 3.281135 0.556060 -0.001081  
H -1.057506 0.283421 0.000804  
N -1.977761 -0.278629 -0.000298  
H -1.976365 -0.885825 0.850116  
H -1.974739 -0.885663 -0.850859  
H -2.720553 0.443302 -0.001006  
N -1.171113 -2.038421 -2.170431  
H -0.275663 -2.033616 -1.670392  
H -1.433111 -3.013333 -2.316037  
H -0.998150 -1.640579 -3.093953  
N -2.879036 2.511863 -0.001704  
H -3.218344 3.021715 0.814392  
H -3.216906 3.021561 -0.818491  
H -1.855598 2.597168 -0.000790  
N -1.172753 -2.038275 2.170383  
H -0.277625 -2.034189 1.669751  
H -0.999275 -1.638514 3.092987  
H -1.434324 -3.012972 2.318147

Isomer IV -b

C -1.817752 0.526985 0.000140  
C -1.350978 -0.974879 0.000723  
O -3.147241 0.599070 -0.000346  
O -1.081105 1.497194 0.000103  
O -2.299483 -1.786178 0.000650  
O -0.104262 -1.188550 0.000299  
H -3.384099 -0.380108 -0.000178  
H 0.965887 0.099293 -0.000058  
N 1.302373 3.326190 0.000317  
H 0.320653 3.027763 0.000451  
H 1.439660 3.919720 -0.817770  
H 1.440010 3.919276 0.818670  
N 2.141708 -1.385618 -2.199467  
H 1.865360 -1.159639 -3.155424  
H 2.757168 -2.196914 -2.261518

|   |          |           |           |
|---|----------|-----------|-----------|
| H | 1.291853 | -1.688813 | -1.708934 |
| N | 1.950655 | 0.511277  | -0.000277 |
| H | 2.385650 | 0.100067  | -0.850425 |
| H | 2.386073 | 0.099861  | 0.849562  |
| H | 1.915339 | 1.561146  | -0.000139 |
| N | 2.143236 | -1.386051 | 2.198355  |
| H | 2.759209 | -2.197001 | 2.259845  |
| H | 1.293362 | -1.689600 | 1.708079  |
| H | 1.867180 | -1.160564 | 3.154512  |

Isomer IV -c

|   |           |           |           |
|---|-----------|-----------|-----------|
| C | -2.137574 | -0.018465 | -0.106006 |
| C | -1.115469 | -1.210641 | -0.056467 |
| O | -3.372713 | -0.464147 | 0.112394  |
| O | -1.861400 | 1.150962  | -0.307449 |
| O | -1.652348 | -2.311801 | 0.183352  |
| O | 0.105642  | -0.943439 | -0.250391 |
| H | -3.194526 | -1.448515 | 0.235745  |
| H | 0.687872  | 0.486181  | -0.559238 |
| N | 1.287674  | 1.367213  | -0.754911 |
| H | 0.881421  | 2.186634  | -0.228480 |
| H | 1.249784  | 1.570955  | -1.754128 |
| H | 2.290856  | 1.152865  | -0.468998 |
| N | 2.691231  | -2.315685 | 0.329596  |
| H | 2.699063  | -2.774356 | 1.241369  |
| H | 1.712753  | -2.045907 | 0.143444  |
| H | 2.930367  | -3.038594 | -0.350050 |
| N | -0.193509 | 3.413783  | 0.636193  |
| H | -0.107842 | 3.513923  | 1.647641  |
| H | -1.030627 | 2.847844  | 0.454082  |
| H | -0.365365 | 4.346565  | 0.261374  |
| N | 3.863722  | 0.450830  | 0.060038  |
| H | 3.595083  | -0.549102 | 0.188615  |
| H | 4.222661  | 0.786382  | 0.954713  |
| H | 4.649487  | 0.474168  | -0.590912 |

Isomer IV -d

|   |           |           |           |
|---|-----------|-----------|-----------|
| C | -1.313357 | 0.541328  | 0.471215  |
| C | -1.942009 | -0.453332 | -0.576797 |
| O | -2.182173 | 1.501196  | 0.754655  |
| O | -0.190920 | 0.472121  | 0.955743  |
| O | -3.119197 | -0.137367 | -0.866427 |
| O | -1.237785 | -1.405083 | -1.001472 |
| H | -2.960045 | 1.193356  | 0.170184  |



|   |          |           |           |
|---|----------|-----------|-----------|
| H | 0.254547 | -1.581097 | -0.723852 |
| N | 1.319015 | -1.807439 | -0.600335 |
| H | 1.526687 | -2.702692 | -1.043605 |
| H | 1.523047 | -1.861132 | 0.429937  |
| H | 1.907059 | -1.041335 | -1.046603 |
| N | 1.926761 | 2.546288  | 0.174754  |
| H | 1.484035 | 3.369630  | -0.235068 |
| H | 2.532550 | 2.891040  | 0.919960  |
| H | 1.177750 | 2.004799  | 0.622299  |
| N | 2.800436 | 0.356065  | -1.764912 |
| H | 3.815209 | 0.295946  | -1.855816 |
| H | 2.442128 | 0.588184  | -2.692502 |
| H | 2.592805 | 1.166868  | -1.148892 |
| N | 1.505953 | -1.637730 | 2.282900  |
| H | 2.314242 | -1.321266 | 2.818001  |
| H | 1.029004 | -2.337379 | 2.851631  |
| H | 0.868615 | -0.840123 | 2.180977  |

Isomer IV -e

|   |           |           |           |
|---|-----------|-----------|-----------|
| C | 0.283369  | -1.017505 | 0.015581  |
| C | -0.255846 | 0.334732  | -0.521771 |
| O | -0.611048 | -1.855158 | 0.475696  |
| O | 1.484018  | -1.263757 | -0.018734 |
| O | -1.237318 | 0.349796  | -1.256350 |
| O | 0.391729  | 1.415287  | -0.158531 |
| H | -1.643503 | -1.535946 | 0.420876  |
| H | 1.260516  | 1.271124  | 0.474606  |
| N | 2.501839  | 1.250547  | 1.317896  |
| H | 3.264870  | 0.906704  | 0.699499  |
| H | 2.413401  | 0.582954  | 2.084076  |
| H | 2.773105  | 2.149639  | 1.715465  |
| N | -3.569097 | 1.664879  | 0.044382  |
| H | -2.769810 | 1.596266  | -0.597184 |
| H | -4.359508 | 2.025835  | -0.489746 |
| H | -3.334475 | 2.376767  | 0.736318  |
| N | 4.186584  | -0.119100 | -0.700308 |
| H | 4.963411  | -0.757978 | -0.533000 |
| H | 3.328752  | -0.681205 | -0.743075 |
| H | 4.331774  | 0.288481  | -1.623745 |
| N | -3.134912 | -1.303144 | 0.404878  |
| H | -3.477048 | -1.692170 | -0.474454 |
| H | -3.643988 | -1.761735 | 1.160767  |
| H | -3.382581 | -0.293718 | 0.402165  |

Isomer IV -f

|   |           |           |           |
|---|-----------|-----------|-----------|
| C | 1.602118  | 0.709788  | 0.188859  |
| C | 1.517626  | -0.863674 | 0.120635  |
| O | 2.646664  | 1.135482  | -0.512345 |
| O | 0.822049  | 1.455829  | 0.761365  |
| O | 2.421177  | -1.361305 | -0.582855 |
| O | 0.572957  | -1.443989 | 0.729850  |
| H | 3.015655  | 0.251731  | -0.838960 |
| H | -0.474176 | -0.655913 | 1.531468  |
| N | -3.004688 | 0.121580  | -0.066564 |
| H | -2.722620 | -0.720329 | -0.600514 |
| H | -4.022700 | 0.161951  | -0.039873 |
| H | -2.657361 | 0.957193  | -0.567456 |
| N | -1.256631 | -0.051172 | 1.996911  |
| H | -1.571284 | -0.441940 | 2.884277  |
| H | -2.080033 | 0.038077  | 1.257417  |
| H | -0.819698 | 0.864085  | 2.134669  |
| N | -1.444959 | 2.572423  | -1.166660 |
| H | -0.613985 | 2.443891  | -0.579981 |
| H | -1.753809 | 3.535526  | -1.030628 |
| H | -1.126078 | 2.510889  | -2.134432 |
| N | -1.644280 | -2.397038 | -1.217200 |
| H | -1.309719 | -2.384387 | -2.181579 |
| H | -0.810252 | -2.313334 | -0.622083 |
| H | -2.021275 | -3.332823 | -1.062821 |

Isomer IV -g

|   |           |           |           |
|---|-----------|-----------|-----------|
| C | 1.220505  | -1.128232 | -0.070981 |
| C | 0.619253  | 0.217597  | -0.611966 |
| O | 0.362465  | -2.027427 | 0.229126  |
| O | 2.451833  | -1.226472 | 0.019070  |
| O | -0.426643 | 0.232808  | -1.259120 |
| O | 1.260116  | 1.338304  | -0.340149 |
| H | -0.947575 | -1.885578 | -0.057614 |
| H | 2.173844  | 1.235964  | 0.154400  |
| N | -2.085298 | -1.823827 | -0.356709 |
| H | -2.630816 | -1.197752 | 0.305706  |
| H | -2.519283 | -2.744096 | -0.423751 |
| H | -2.066872 | -1.370771 | -1.272845 |
| N | -2.317346 | 2.404944  | -0.298391 |
| H | -1.605535 | 1.847624  | -0.790542 |
| H | -2.891135 | 2.854620  | -1.012410 |
| H | -1.814557 | 3.154856  | 0.177504  |

|   |           |          |          |
|---|-----------|----------|----------|
| N | -3.401883 | 0.078243 | 1.334435 |
| H | -4.416048 | 0.100904 | 1.444861 |
| H | -3.007829 | 0.107588 | 2.275736 |
| H | -3.119820 | 0.957986 | 0.856128 |
| N | 3.632988  | 1.163384 | 0.817455 |
| H | 3.760543  | 1.334437 | 1.813435 |
| H | 3.672312  | 0.150288 | 0.641878 |
| H | 4.392833  | 1.620833 | 0.316252 |

Isomer IV -h

|   |           |           |           |
|---|-----------|-----------|-----------|
| C | -2.378500 | -0.501194 | -0.222221 |
| C | -1.524832 | 0.766965  | 0.169992  |
| O | -3.516320 | -0.118047 | -0.791856 |
| O | -2.072605 | -1.670277 | -0.052812 |
| O | -2.070292 | 1.840549  | -0.153753 |
| O | -0.408145 | 0.594147  | 0.745767  |
| H | -3.409942 | 0.884106  | -0.769321 |
| H | 0.166523  | -0.781970 | 0.987073  |
| N | 1.816828  | 2.598310  | 0.270198  |
| H | 1.532542  | 3.242174  | -0.469594 |
| H | 1.990907  | 3.179198  | 1.091405  |
| H | 0.985409  | 2.029343  | 0.485095  |
| N | 0.479572  | -1.833675 | 1.054168  |
| H | -0.356059 | -2.305010 | 0.674592  |
| H | 0.632546  | -2.115096 | 2.022131  |
| H | 1.356935  | -2.015301 | 0.456493  |
| N | 2.761148  | -2.135206 | -0.554425 |
| H | 2.500059  | -2.342115 | -1.519930 |
| H | 3.229497  | -1.199794 | -0.558222 |
| H | 3.466243  | -2.826768 | -0.295979 |
| N | 4.003629  | 0.598163  | -0.516538 |
| H | 3.288516  | 1.305578  | -0.251906 |
| H | 4.367502  | 0.878297  | -1.428730 |
| H | 4.779976  | 0.708613  | 0.137684  |

**(H<sub>2</sub>C<sub>2</sub>O<sub>4</sub>)(NH<sub>3</sub>)<sub>5</sub>**

Isomer V -a

|   |           |           |           |
|---|-----------|-----------|-----------|
| C | -1.354749 | -1.159157 | 0.078431  |
| C | -2.197446 | 0.110952  | -0.307460 |
| O | -0.128709 | -0.984285 | 0.335589  |
| O | -2.023395 | -2.214323 | 0.079715  |
| O | -1.771989 | 1.248528  | -0.386889 |
| O | -3.464260 | -0.229418 | -0.542650 |
| H | 0.671461  | 0.520042  | 0.118300  |

|   |           |           |           |
|---|-----------|-----------|-----------|
| H | -3.421308 | -1.222704 | -0.383792 |
| N | -0.021523 | 3.670647  | -0.493409 |
| H | 0.106535  | 4.115318  | -1.402297 |
| H | -0.222012 | 4.416676  | 0.172506  |
| H | -0.859689 | 3.082298  | -0.555553 |
| N | 2.129999  | -2.546563 | -0.907586 |
| H | 1.806010  | -3.005120 | -1.760301 |
| H | 1.286956  | -2.189781 | -0.432808 |
| H | 2.505675  | -3.290227 | -0.317901 |
| N | 1.419205  | 1.254786  | 0.266895  |
| H | 2.270026  | 0.981422  | -0.297293 |
| H | 1.624092  | 1.179248  | 1.283384  |
| H | 1.046051  | 2.201407  | 0.010537  |
| N | 3.587094  | 0.108017  | -1.253321 |
| H | 4.534805  | 0.095369  | -0.875121 |
| H | 3.216511  | -0.862767 | -1.201578 |
| H | 3.674420  | 0.347672  | -2.241511 |
| N | 1.284442  | 0.078604  | 2.945101  |
| H | 1.994336  | -0.480694 | 3.418241  |
| H | 0.669778  | 0.443482  | 3.673244  |
| H | 0.721837  | -0.564865 | 2.376242  |

Isomer V -b

|   |           |           |           |
|---|-----------|-----------|-----------|
| C | -2.170523 | -0.283858 | -0.000077 |
| C | -1.095430 | -1.440272 | -0.000321 |
| O | -1.756943 | 0.898510  | 0.000163  |
| O | -3.336418 | -0.751567 | -0.000139 |
| O | 0.124234  | -1.297274 | -0.000309 |
| O | -1.693385 | -2.618570 | -0.000567 |
| H | 0.787300  | 0.364765  | -0.000260 |
| H | -2.665349 | -2.300448 | -0.000564 |
| N | -0.347357 | 2.464454  | -2.096237 |
| H | -0.589605 | 3.452008  | -2.175961 |
| H | -0.377778 | 2.079411  | -3.040372 |
| H | -1.093507 | 2.005190  | -1.554021 |
| N | -0.346690 | 2.463533  | 2.096864  |
| H | -0.376760 | 2.078150  | 3.040872  |
| H | -0.589013 | 3.451034  | 2.177019  |
| H | -1.092970 | 2.004393  | 1.554723  |
| N | 2.998581  | -2.413394 | 0.001099  |
| H | 1.984600  | -2.249828 | 0.000015  |
| H | 3.200898  | -2.994430 | -0.813243 |
| H | 3.199448  | -2.992121 | 0.817444  |
| N | 4.045065  | 0.477205  | -0.000662 |

|   |          |           |           |
|---|----------|-----------|-----------|
| H | 3.835681 | -0.539764 | -0.000127 |
| H | 4.624935 | 0.669079  | -0.818170 |
| H | 4.625735 | 0.669792  | 0.816109  |
| N | 1.263400 | 1.297131  | -0.000183 |
| H | 2.306960 | 1.154862  | -0.000356 |
| H | 0.911997 | 1.810846  | -0.846712 |
| H | 0.912245 | 1.810533  | 0.846639  |

Isomer V -c

|   |           |           |           |
|---|-----------|-----------|-----------|
| C | 1.628778  | -0.001231 | 0.569181  |
| C | 2.179680  | -0.001597 | -0.905741 |
| O | 0.368037  | -0.000961 | 0.725968  |
| O | 2.521924  | -0.001225 | 1.438649  |
| O | 1.510148  | -0.001664 | -1.920795 |
| O | 3.514426  | -0.001663 | -0.896176 |
| H | -0.631833 | -0.000073 | -0.557856 |
| H | 3.701037  | -0.001472 | 0.089940  |
| N | -1.092129 | -2.472811 | 1.776235  |
| H | -0.432516 | -3.243063 | 1.894122  |
| H | -1.542935 | -2.348779 | 2.683473  |
| H | -0.525590 | -1.629836 | 1.609224  |
| N | -1.086909 | 2.473672  | 1.776695  |
| H | -0.425440 | 3.242289  | 1.894857  |
| H | -0.522350 | 1.629339  | 1.609814  |
| H | -1.538326 | 2.350703  | 2.683775  |
| N | -2.723000 | -2.455916 | -0.808775 |
| H | -2.504467 | -3.267624 | -1.387513 |
| H | -3.730625 | -2.476820 | -0.649495 |
| H | -2.256963 | -2.595076 | 0.109782  |
| N | -1.335362 | 0.000698  | -1.365043 |
| H | -0.757604 | 0.000398  | -2.208892 |
| H | -1.922241 | 0.878241  | -1.298751 |
| H | -1.923786 | -0.875837 | -1.299165 |
| N | -2.717126 | 2.460631  | -0.808777 |
| H | -2.250985 | 2.598592  | 0.109914  |
| H | -2.496010 | 3.271601  | -1.387573 |
| H | -3.724733 | 2.484574  | -0.649805 |

Isomer V -d

|   |           |           |           |
|---|-----------|-----------|-----------|
| C | -1.932391 | 0.464547  | -0.403888 |
| C | -1.595445 | -0.955989 | 0.187535  |
| O | -1.007386 | 1.315024  | -0.444684 |
| O | -3.126610 | 0.551063  | -0.771793 |
| O | -0.516422 | -1.312274 | 0.641727  |

|   |           |           |           |
|---|-----------|-----------|-----------|
| O | -2.664367 | -1.739102 | 0.119696  |
| H | 0.558487  | 0.996582  | -0.001780 |
| H | -3.324122 | -1.086124 | -0.295270 |
| N | 3.225400  | -0.453855 | -1.446165 |
| H | 3.170506  | -0.216092 | -2.437341 |
| H | 2.758493  | -1.373345 | -1.326034 |
| H | 4.215453  | -0.584290 | -1.235902 |
| N | 1.335704  | -0.221607 | 2.843952  |
| H | 2.013173  | -0.875705 | 3.235574  |
| H | 0.629788  | -0.773472 | 2.343880  |
| H | 0.866258  | 0.222344  | 3.633418  |
| N | 1.570922  | -2.981395 | -0.912688 |
| H | 1.125516  | -3.390526 | -1.735077 |
| H | 0.817249  | -2.571447 | -0.348711 |
| H | 1.946206  | -3.764572 | -0.376656 |
| N | 1.569326  | 1.171473  | 0.288045  |
| H | 1.676690  | 0.823136  | 1.267903  |
| H | 2.233489  | 0.659598  | -0.353735 |
| H | 1.664897  | 2.203474  | 0.219200  |
| N | 0.632496  | 3.892383  | -0.272509 |
| H | -0.200475 | 3.317021  | -0.451156 |
| H | 0.369852  | 4.587208  | 0.426849  |
| H | 0.826909  | 4.408173  | -1.131045 |

Isomer V -e

|   |           |           |           |
|---|-----------|-----------|-----------|
| C | 0.146676  | -1.850464 | 0.189249  |
| C | 1.510292  | -1.310236 | -0.374678 |
| O | -0.836463 | -1.057930 | 0.187521  |
| O | 0.216370  | -3.032679 | 0.587692  |
| O | 1.698555  | -0.200636 | -0.845224 |
| O | 2.455223  | -2.240510 | -0.258870 |
| H | -0.707488 | 0.458353  | -0.310149 |
| H | 1.918369  | -2.990760 | 0.152515  |
| N | -3.807987 | -1.047012 | 0.480362  |
| H | -4.120033 | -1.196060 | 1.440624  |
| H | -2.797183 | -1.251766 | 0.462705  |
| H | -4.262401 | -1.770642 | -0.077880 |
| N | -3.661276 | 1.772623  | -0.623343 |
| H | -3.854058 | 0.822915  | -0.239839 |
| H | -4.171011 | 1.853371  | -1.503903 |
| H | -4.082167 | 2.449105  | 0.014565  |
| N | 3.469153  | 2.083598  | 0.070811  |
| H | 4.168423  | 1.789462  | 0.753386  |
| H | 3.980735  | 2.555793  | -0.675190 |

|   |           |          |           |
|---|-----------|----------|-----------|
| H | 3.073074  | 1.226479 | -0.334867 |
| N | -0.800370 | 1.476386 | -0.647710 |
| H | -0.266960 | 2.127217 | 0.000785  |
| H | -0.369661 | 1.523743 | -1.571614 |
| H | -1.830371 | 1.719009 | -0.697147 |
| N | 0.792265  | 3.139340 | 1.070892  |
| H | 1.760962  | 2.883882 | 0.793336  |
| H | 0.718962  | 4.156155 | 1.024545  |
| H | 0.687023  | 2.887436 | 2.054665  |

Isomer V -f

|   |           |           |           |
|---|-----------|-----------|-----------|
| C | -0.894076 | 0.260840  | 0.472601  |
| C | -0.602310 | -0.964560 | -0.440032 |
| O | -0.117871 | 0.404695  | 1.460277  |
| O | -1.834956 | 1.016601  | 0.127495  |
| O | 0.521411  | -1.132500 | -0.913059 |
| O | -1.586932 | -1.811468 | -0.689643 |
| H | 1.416254  | 0.085416  | 1.333616  |
| H | -2.504169 | -1.494622 | -0.319891 |
| N | -3.941639 | -0.881366 | 0.119601  |
| H | -4.344618 | -1.111546 | 1.026536  |
| H | -4.683865 | -0.926045 | -0.576898 |
| H | -3.571836 | 0.079074  | 0.156121  |
| N | 2.851539  | -2.621401 | 0.096701  |
| H | 2.664490  | -3.441918 | 0.673114  |
| H | 3.591321  | -2.881562 | -0.555388 |
| H | 2.003679  | -2.435958 | -0.455303 |
| N | -0.037936 | 3.491007  | -0.185770 |
| H | -0.750878 | 2.772725  | 0.005881  |
| H | -0.472169 | 4.181667  | -0.798690 |
| H | 0.136708  | 3.962172  | 0.702463  |
| N | 2.238415  | 1.664844  | -1.145876 |
| H | 1.527372  | 2.376575  | -0.885233 |
| H | 1.743304  | 0.939515  | -1.671244 |
| H | 2.907614  | 2.102170  | -1.778513 |
| N | 2.475759  | 0.061438  | 1.118898  |
| H | 2.755574  | -0.915834 | 0.846458  |
| H | 2.586690  | 0.721882  | 0.277390  |
| H | 3.016648  | 0.388341  | 1.918738  |

Isomer V -g

|   |           |           |          |
|---|-----------|-----------|----------|
| C | 0.449234  | -1.342003 | 0.394866 |
| C | -1.123091 | -1.275400 | 0.477127 |
| O | 1.120243  | -0.686920 | 1.218834 |

|   |           |           |           |
|---|-----------|-----------|-----------|
| O | 0.834516  | -2.043710 | -0.586625 |
| O | -1.783048 | -0.570335 | 1.219809  |
| O | -1.658755 | -2.056311 | -0.467833 |
| H | 0.388889  | 0.897131  | 1.914618  |
| H | -0.809156 | -2.410880 | -0.893420 |
| N | -0.009824 | 1.851390  | 2.001036  |
| H | -0.247469 | 2.172777  | 0.331566  |
| H | 0.611323  | 2.405892  | 2.589790  |
| H | -0.889844 | 1.737101  | 2.504598  |
| N | 3.697444  | 0.328000  | 0.041957  |
| H | 4.356435  | -0.400583 | -0.234280 |
| H | 2.943521  | -0.140981 | 0.568178  |
| H | 4.194056  | 0.934470  | 0.694805  |
| N | -0.436923 | 2.220166  | -0.734798 |
| H | -0.385736 | 3.190680  | -1.046717 |
| H | -1.412954 | 1.849492  | -0.912139 |
| H | 0.306656  | 1.630721  | -1.271727 |
| N | 1.507386  | 0.667361  | -2.005929 |
| H | 1.250514  | -0.323820 | -1.925628 |
| H | 2.376460  | 0.749633  | -1.443743 |
| H | 1.749404  | 0.838701  | -2.982216 |
| N | -3.086442 | 1.061958  | -0.948493 |
| H | -3.002670 | 0.467363  | -0.113115 |
| H | -3.922812 | 1.634965  | -0.835008 |
| H | -3.268605 | 0.427845  | -1.727423 |

Isomer V -h

|   |           |           |           |
|---|-----------|-----------|-----------|
| C | -2.520430 | -0.199344 | -0.055899 |
| C | -1.335854 | -1.229858 | -0.115729 |
| O | -3.660437 | -0.828030 | 0.221907  |
| O | -2.430609 | 1.003413  | -0.229227 |
| O | -1.695307 | -2.405292 | 0.112656  |
| O | -0.179437 | -0.788585 | -0.372013 |
| H | -3.331881 | -1.778835 | 0.294735  |
| H | 0.184463  | 0.728794  | -0.631237 |
| N | -1.076520 | 3.390329  | 0.879894  |
| H | -1.403411 | 4.325702  | 0.638623  |
| H | -0.917345 | 3.383809  | 1.887367  |
| H | -1.842169 | 2.734481  | 0.686925  |
| N | 4.061773  | -0.702906 | 0.965278  |
| H | 5.020261  | -1.046940 | 0.892468  |
| H | 3.441460  | -1.456841 | 0.605482  |
| H | 3.868598  | -0.620163 | 1.964610  |
| N | 2.104521  | -2.766706 | -0.130823 |



|   |          |           |           |
|---|----------|-----------|-----------|
| H | 1.262788 | -2.184481 | -0.256997 |
| H | 1.823777 | -3.534606 | 0.480678  |
| H | 2.302366 | -3.191563 | -1.037705 |
| N | 0.547024 | 1.724155  | -0.847231 |
| H | 1.609692 | 1.772067  | -0.754547 |
| H | 0.276981 | 1.951914  | -1.804965 |
| H | 0.069891 | 2.409251  | -0.203818 |
| N | 3.388609 | 1.780214  | -0.582148 |
| H | 3.890646 | 1.732818  | -1.470266 |
| H | 3.766240 | 2.589905  | -0.087565 |
| H | 3.663812 | 0.932249  | -0.035392 |

Isomer V -i

|   |           |           |           |
|---|-----------|-----------|-----------|
| C | -1.372385 | -1.085115 | 0.264230  |
| C | -0.804066 | 0.131301  | -0.535220 |
| O | -0.540685 | -1.658865 | 1.031640  |
| O | -2.566472 | -1.383472 | 0.074776  |
| O | 0.288862  | 0.073962  | -1.104352 |
| O | -1.515958 | 1.244082  | -0.572589 |
| H | 0.935194  | -1.380617 | 1.072233  |
| H | -2.471105 | 1.165121  | -0.153852 |
| N | 2.818623  | 1.397166  | 1.695659  |
| H | 2.332458  | 1.775548  | 2.509987  |
| H | 2.498155  | 1.945799  | 0.870970  |
| H | 3.808409  | 1.606909  | 1.830925  |
| N | -3.978669 | 0.995837  | 0.345130  |
| H | -4.251250 | 1.263980  | 1.289253  |
| H | -3.888319 | -0.031400 | 0.300338  |
| H | -4.711695 | 1.296983  | -0.295051 |
| N | 2.037482  | -1.316900 | 1.113653  |
| H | 2.387787  | -1.969989 | 1.814696  |
| H | 2.355651  | -0.332497 | 1.350692  |
| H | 2.386625  | -1.593855 | 0.160116  |
| N | 1.709516  | 2.732387  | -0.793955 |
| H | 2.309587  | 3.027252  | -1.564669 |
| H | 1.022673  | 3.476061  | -0.663854 |
| H | 1.179930  | 1.909962  | -1.115519 |
| N | 2.412321  | -1.931465 | -1.668958 |
| H | 3.118793  | -1.596624 | -2.323243 |
| H | 2.136483  | -2.863464 | -1.978060 |
| H | 1.588453  | -1.321113 | -1.755516 |

Isomer V -j

|   |          |          |           |
|---|----------|----------|-----------|
| C | 0.041482 | 0.786197 | -0.588925 |
|---|----------|----------|-----------|

|   |           |           |           |
|---|-----------|-----------|-----------|
| C | -1.072488 | -0.241657 | -0.173269 |
| O | -0.135412 | 2.056264  | -0.286774 |
| O | 1.061183  | 0.411960  | -1.165973 |
| O | -2.245064 | 0.163720  | -0.097038 |
| O | -0.666888 | -1.428778 | 0.047888  |
| H | -1.053396 | 2.310607  | 0.143672  |
| H | 0.627156  | -1.845099 | -0.254840 |
| N | 3.656334  | 1.465343  | -0.018489 |
| H | 3.517118  | 2.299442  | 0.552951  |
| H | 2.784489  | 1.326450  | -0.547756 |
| H | 4.381752  | 1.702420  | -0.695898 |
| N | 3.590864  | -1.267591 | 1.297017  |
| H | 3.212772  | -1.182145 | 2.241474  |
| H | 3.727601  | -0.302228 | 0.932261  |
| H | 4.513204  | -1.693653 | 1.392179  |
| N | -4.287008 | -2.280835 | 0.132785  |
| H | -3.631571 | -1.492866 | 0.070912  |
| H | -3.750543 | -3.052691 | 0.531099  |
| H | -4.981534 | -2.027847 | 0.836883  |
| N | -2.456606 | 2.825697  | 0.713268  |
| H | -2.565763 | 3.037655  | 1.703588  |
| H | -2.932470 | 3.550641  | 0.178480  |
| H | -2.893069 | 1.917109  | 0.513123  |
| N | 1.665094  | -2.239698 | -0.557472 |
| H | 1.661072  | -3.247973 | -0.711085 |
| H | 1.871917  | -1.746796 | -1.428609 |
| H | 2.406003  | -1.966007 | 0.160133  |

**(H<sub>2</sub>C<sub>2</sub>O<sub>4</sub>)(NH<sub>3</sub>)<sub>6</sub>**

Isomers VI -a

|   |           |           |           |
|---|-----------|-----------|-----------|
| C | -2.388623 | 0.465398  | -0.009478 |
| C | -1.635553 | -0.914249 | -0.008119 |
| O | -3.707928 | 0.268811  | -0.002596 |
| O | -1.865726 | 1.563179  | -0.015523 |
| O | -2.405936 | -1.898863 | -0.000306 |
| O | -0.370645 | -0.891634 | -0.014427 |
| H | -3.746189 | -0.736732 | 0.001321  |
| H | 0.635030  | 0.522623  | -0.001702 |
| N | 2.896240  | 0.305499  | -2.363155 |
| H | 3.890697  | 0.084572  | -2.303110 |
| H | 2.383577  | -0.592697 | -2.465724 |
| H | 2.769250  | 0.828063  | -3.230546 |
| N | 2.801437  | 0.320835  | 2.445844  |
| H | 2.310715  | -0.592855 | 2.512497  |

|   |           |           |           |
|---|-----------|-----------|-----------|
| H | 2.608534  | 0.831968  | 3.307895  |
| H | 3.803871  | 0.129897  | 2.442472  |
| N | 1.455718  | 1.184764  | 0.011536  |
| H | 2.044306  | 0.982659  | -0.839102 |
| H | 2.010517  | 0.988888  | 0.886097  |
| H | 1.104385  | 2.172073  | 0.001319  |
| N | 0.116443  | 3.795004  | -0.018388 |
| H | -0.773573 | 3.284893  | -0.021318 |
| H | 0.112707  | 4.409494  | 0.795564  |
| H | 0.124887  | 4.397720  | -0.841060 |
| N | 1.113378  | -2.217570 | 2.282417  |
| H | 1.531319  | -3.117798 | 2.044536  |
| H | 0.543091  | -1.932110 | 1.473284  |
| H | 0.458761  | -2.405663 | 3.042861  |
| N | 1.129592  | -2.183168 | -2.318004 |
| H | 1.507389  | -3.107462 | -2.106748 |
| H | 0.487364  | -2.316082 | -3.100351 |
| H | 0.550642  | -1.907832 | -1.511539 |

#### Isomers VI -b

|   |           |           |           |
|---|-----------|-----------|-----------|
| C | -1.565463 | 1.445533  | 0.240681  |
| C | -0.144611 | 1.975742  | -0.182970 |
| O | -1.656649 | 0.241033  | 0.572794  |
| O | -2.435068 | 2.349742  | 0.166852  |
| O | 0.883288  | 1.309874  | -0.245638 |
| O | -0.203927 | 3.264421  | -0.479365 |
| H | 0.741865  | -0.502211 | 0.053267  |
| H | -1.199213 | 3.419651  | -0.321367 |
| N | 3.799211  | -1.701557 | 0.181549  |
| H | 3.986445  | -0.705601 | -0.045509 |
| H | 4.290460  | -1.911861 | 1.051060  |
| H | 4.243004  | -2.266890 | -0.542992 |
| N | -3.311364 | -1.685650 | -0.980970 |
| H | -4.020835 | -2.160880 | -0.422057 |
| H | -3.817888 | -1.205078 | -1.725667 |
| H | -2.903528 | -0.949487 | -0.383724 |
| N | 0.888862  | -1.515493 | 0.251913  |
| H | 0.452112  | -1.700607 | 1.188716  |
| H | 0.383274  | -2.088959 | -0.481161 |
| H | 1.923566  | -1.709947 | 0.253725  |
| N | 3.938106  | 1.292755  | -0.471373 |
| H | 4.282631  | 1.589142  | -1.385107 |
| H | 2.931616  | 1.498946  | -0.454212 |
| H | 4.375463  | 1.913133  | 0.210829  |

|   |           |           |           |
|---|-----------|-----------|-----------|
| N | -0.704524 | -1.585391 | 2.677303  |
| H | -1.351450 | -2.334735 | 2.922367  |
| H | -0.397131 | -1.164473 | 3.553960  |
| H | -1.237709 | -0.870571 | 2.161243  |
| N | -0.661257 | -2.988480 | -1.698199 |
| H | -0.702629 | -4.005955 | -1.628283 |
| H | -0.443189 | -2.777787 | -2.673050 |
| H | -1.620789 | -2.627347 | -1.517010 |

Isomers VI -c

|   |           |           |           |
|---|-----------|-----------|-----------|
| C | 0.823244  | -1.439517 | 0.129023  |
| C | -0.748098 | -1.380570 | 0.020904  |
| O | 1.337251  | -1.840916 | -1.042878 |
| O | 1.496262  | -1.123676 | 1.091491  |
| O | -1.145383 | -1.692693 | -1.142759 |
| O | -1.402590 | -1.007398 | 1.014104  |
| H | 0.472181  | -1.978901 | -1.558984 |
| H | -0.580085 | 0.370091  | 2.055011  |
| N | 2.260711  | 1.351044  | -1.570038 |
| H | 2.992384  | 1.171292  | -0.856103 |
| H | 2.690967  | 1.893177  | -2.320034 |
| H | 2.038409  | 0.432609  | -1.961951 |
| N | -0.127483 | 2.315671  | -0.335879 |
| H | -0.988333 | 1.893624  | -0.854211 |
| H | 0.776715  | 1.999418  | -0.813434 |
| H | -0.182134 | 3.334490  | -0.366647 |
| N | 4.123163  | 0.335865  | 0.616154  |
| H | 3.378131  | -0.319726 | 0.886405  |
| H | 4.904685  | -0.227113 | 0.279464  |
| H | 4.444682  | 0.796498  | 1.467663  |
| N | -0.128967 | 1.271622  | 2.292906  |
| H | -0.122622 | 1.995344  | 0.690283  |
| H | -0.643774 | 1.689293  | 3.067882  |
| H | 0.799226  | 1.027871  | 2.639533  |
| N | -2.304586 | 1.113693  | -1.605119 |
| H | -2.685232 | 1.481142  | -2.477298 |
| H | -3.085232 | 1.023043  | -0.929699 |
| H | -2.004074 | 0.145741  | -1.781438 |
| N | -4.148964 | 0.161985  | 0.601572  |
| H | -4.852602 | -0.500962 | 0.275000  |
| H | -4.501563 | 0.548495  | 1.477306  |
| H | -3.304054 | -0.386592 | 0.824856  |

Isomers VI -d

|   |           |           |           |
|---|-----------|-----------|-----------|
| C | -1.292374 | -1.330158 | -0.668426 |
| C | 0.230224  | -1.227027 | -1.058888 |
| O | -1.523928 | -2.481171 | -0.029852 |
| O | -2.144873 | -0.479469 | -0.853764 |
| O | 0.894123  | -2.214920 | -0.625223 |
| O | 0.615817  | -0.222046 | -1.688928 |
| H | -0.591977 | -2.875107 | -0.045822 |
| H | -0.429703 | 1.319331  | -1.912057 |
| N | 1.888083  | -1.605095 | 2.197270  |
| H | 2.847345  | -1.897963 | 2.386237  |
| H | 1.294370  | -2.160548 | 2.814163  |
| H | 1.672400  | -1.901496 | 1.235442  |
| N | 3.250389  | 1.019207  | -1.034758 |
| H | 2.442044  | 0.484899  | -1.390709 |
| H | 4.033147  | 0.366077  | -0.986444 |
| H | 3.494852  | 1.703757  | -1.750907 |
| N | -0.681340 | 2.429884  | 0.960309  |
| H | -1.465718 | 1.842479  | 1.353488  |
| H | 0.305113  | 2.032490  | 1.256967  |
| H | -0.776598 | 3.383099  | 1.312821  |
| N | -0.934509 | 2.221882  | -1.824535 |
| H | -0.771715 | 2.439323  | -0.115316 |
| H | -0.550177 | 2.870560  | -2.511200 |
| H | -1.898493 | 2.025453  | -2.094895 |
| N | 1.806825  | 1.448959  | 1.635204  |
| H | 1.781041  | 0.467592  | 1.966264  |
| H | 2.325410  | 1.982911  | 2.334085  |
| H | 2.382983  | 1.437619  | 0.771292  |
| N | -2.894456 | 0.721630  | 1.777197  |
| H | -2.741229 | 0.037404  | 2.518856  |
| H | -2.932628 | 0.193535  | 0.894647  |
| H | -3.821624 | 1.117270  | 1.934312  |

Isomers VI -e

|   |           |           |           |
|---|-----------|-----------|-----------|
| C | -1.030961 | 0.071546  | -0.505378 |
| C | -1.282868 | -1.180706 | 0.394435  |
| O | -1.981650 | 0.986157  | -0.604667 |
| O | 0.038753  | 0.211934  | -1.101744 |
| O | -2.373282 | -1.770715 | 0.265831  |
| O | -0.315530 | -1.487228 | 1.154876  |
| H | -2.887631 | 0.717341  | -0.160465 |
| H | 0.956388  | -0.619837 | 1.340788  |
| N | 3.903208  | -1.228591 | -0.077804 |
| H | 4.584652  | -1.893652 | 0.288629  |

|   |           |           |           |
|---|-----------|-----------|-----------|
| H | 3.226272  | -1.759590 | -0.666752 |
| H | 4.414275  | -0.595101 | -0.693244 |
| N | 0.746006  | 3.104080  | -1.490852 |
| H | 0.451936  | 2.119546  | -1.568145 |
| H | 1.379916  | 3.295836  | -2.266721 |
| H | -0.090023 | 3.666420  | -1.652465 |
| N | 1.621587  | 2.758622  | 1.381244  |
| H | 1.367976  | 2.975691  | 0.394576  |
| H | 2.448292  | 3.313556  | 1.606990  |
| H | 0.866084  | 3.124970  | 1.962708  |
| N | 1.562482  | -2.443274 | -1.463056 |
| H | 1.058313  | -3.044998 | -0.809212 |
| H | 1.032324  | -1.562185 | -1.479930 |
| H | 1.475298  | -2.870795 | -2.384820 |
| N | -4.312068 | 0.220505  | 0.379876  |
| H | -5.092862 | 0.275298  | -0.272208 |
| H | -4.650756 | 0.484235  | 1.303558  |
| H | -3.964271 | -0.751441 | 0.412807  |
| N | 1.880696  | -0.109399 | 1.620423  |
| H | 2.074270  | -0.327126 | 2.598959  |
| H | 1.788559  | 0.943606  | 1.520129  |
| H | 2.684254  | -0.471602 | 1.027299  |

Isomers VI -f

|   |           |           |           |
|---|-----------|-----------|-----------|
| C | -0.308373 | -1.762037 | 0.018262  |
| C | -1.832937 | -1.370895 | -0.056138 |
| O | 0.491376  | -0.915939 | 0.498182  |
| O | -0.083641 | -2.902864 | -0.451952 |
| O | -2.322314 | -0.314877 | 0.308848  |
| O | -2.531137 | -2.363467 | -0.604029 |
| H | -0.104538 | 0.365468  | 1.779515  |
| H | -1.787089 | -3.029550 | -0.768456 |
| N | -0.468017 | 2.885773  | 0.159413  |
| H | -0.229566 | 3.868335  | 0.293065  |
| H | 0.264026  | 2.392846  | -0.499623 |
| H | -1.441322 | 2.797910  | -0.244175 |
| N | 1.303874  | 1.399021  | -1.310482 |
| H | 1.162817  | 1.292983  | -2.315577 |
| H | 1.059441  | 0.499440  | -0.872410 |
| H | 2.323007  | 1.518587  | -1.152538 |
| N | -3.124148 | 2.301825  | -0.822600 |
| H | -3.298870 | 2.272161  | -1.827463 |
| H | -3.086631 | 1.326852  | -0.494349 |
| H | -3.947583 | 2.729720  | -0.398521 |

|   |           |           |           |
|---|-----------|-----------|-----------|
| N | -0.395798 | 1.169800  | 2.366109  |
| H | -1.328041 | 0.942337  | 2.712777  |
| H | 0.226349  | 1.215539  | 3.172787  |
| H | -0.441120 | 2.357371  | 1.096669  |
| N | 4.267885  | 1.262018  | -0.616801 |
| H | 4.705549  | 1.817911  | 0.118747  |
| H | 4.121656  | 0.307871  | -0.234488 |
| H | 4.959570  | 1.182461  | -1.363124 |
| N | 3.470321  | -1.521531 | 0.443000  |
| H | 2.444359  | -1.428844 | 0.503763  |
| H | 3.792047  | -1.822177 | 1.363970  |
| H | 3.640702  | -2.310793 | -0.182168 |

Isomers VI -g

|   |           |           |           |
|---|-----------|-----------|-----------|
| C | -0.655717 | -0.386255 | 0.988700  |
| C | -0.631188 | 0.285850  | -0.427316 |
| O | -1.748034 | -0.265752 | 1.706655  |
| O | 0.330058  | -0.998980 | 1.403309  |
| O | -1.675795 | 0.279302  | -1.099869 |
| O | 0.499318  | 0.775406  | -0.759829 |
| H | -2.546794 | 0.278732  | 1.258684  |
| H | 1.701473  | 0.627656  | 0.176343  |
| N | 2.234396  | 3.324345  | -0.666392 |
| H | 2.753085  | 3.606856  | -1.498270 |
| H | 1.456359  | 2.732100  | -0.983908 |
| H | 1.824139  | 4.174644  | -0.279732 |
| N | 2.631427  | 0.801614  | 0.737054  |
| H | 2.431871  | 0.668830  | 1.728711  |
| H | 2.865563  | 1.789569  | 0.518944  |
| H | 3.394177  | 0.127152  | 0.429439  |
| N | 1.868137  | -2.649721 | -0.651010 |
| H | 1.317802  | -2.149158 | 0.061637  |
| H | 1.691407  | -3.645885 | -0.520629 |
| H | 1.458167  | -2.397244 | -1.551464 |
| N | -3.825310 | 1.006192  | 0.774574  |
| H | -4.502109 | 1.323190  | 1.467961  |
| H | -3.544987 | 1.806127  | 0.207592  |
| H | -4.280328 | 0.333403  | 0.130193  |
| N | -4.323096 | -1.075190 | -1.299258 |
| H | -3.331588 | -0.811176 | -1.382534 |
| H | -4.741056 | -0.997370 | -2.225948 |
| H | -4.358019 | -2.060960 | -1.040454 |
| N | 4.440287  | -1.200773 | -0.169923 |
| H | 3.665499  | -1.856601 | -0.406022 |

|   |          |           |           |
|---|----------|-----------|-----------|
| H | 5.062361 | -1.676074 | 0.484266  |
| H | 4.979150 | -1.036424 | -1.020557 |

Isomers VI -h

|   |           |           |           |
|---|-----------|-----------|-----------|
| C | -0.404609 | -0.849825 | -0.800953 |
| C | 0.578034  | 0.346668  | -1.033956 |
| O | 0.030335  | -1.846507 | -0.148673 |
| O | -1.588030 | -0.754579 | -1.246494 |
| O | 1.672493  | 0.117461  | -1.607606 |
| O | 0.219867  | 1.485493  | -0.578618 |
| H | 1.551502  | -2.003866 | -0.017423 |
| H | -1.333737 | 1.837595  | -0.558019 |
| N | -3.909315 | 1.128615  | 1.570619  |
| H | -4.903862 | 1.340262  | 1.655759  |
| H | -3.815469 | 0.094663  | 1.470869  |
| H | -3.480285 | 1.388593  | 2.459450  |
| N | 3.699446  | -0.314286 | 1.944965  |
| H | 4.687919  | -0.310911 | 2.198550  |
| H | 3.478816  | 0.622400  | 1.540691  |
| H | 3.177265  | -0.395226 | 2.818405  |
| N | 2.974067  | 2.263586  | 0.529816  |
| H | 3.585152  | 2.354671  | -0.283077 |
| H | 2.967490  | 3.174314  | 0.990328  |
| H | 2.031174  | 2.112456  | 0.139722  |
| N | -2.382666 | 1.702674  | -0.770941 |
| H | -2.983013 | 1.650292  | 0.102202  |
| H | -2.730334 | 2.387815  | -1.439180 |
| H | -2.299025 | 0.722494  | -1.185160 |
| N | 2.629926  | -1.890364 | -0.175308 |
| H | 2.577781  | -1.189133 | -0.960040 |
| H | 3.103624  | -1.429694 | 0.656790  |
| H | 3.082769  | -2.759501 | -0.451232 |
| N | -3.389977 | -1.781626 | 0.929310  |
| H | -2.836455 | -2.331247 | 1.587998  |
| H | -2.777866 | -1.633576 | 0.110515  |
| H | -4.151681 | -2.388597 | 0.624205  |



**Data S2:** Harmonic frequencies (in  $\text{cm}^{-1}$ ) and IR intensities for  $(\text{H}_2\text{C}_2\text{O}_4)(\text{NH}_3)_n$  ( $n=1\sim 6$ ) isomers

**$(\text{H}_2\text{C}_2\text{O}_4)(\text{NH}_3)_1$**

**Isomer I -a**

| #  | Frequency | Infrared  |
|----|-----------|-----------|
| 1  | 60.9994   | 8.0863    |
| 2  | 117.9171  | 0.0085    |
| 3  | 132.3868  | 0.4123    |
| 4  | 160.2857  | 6.5773    |
| 5  | 226.6888  | 55.8709   |
| 6  | 322.1229  | 43.1225   |
| 7  | 369.9357  | 4.8618    |
| 8  | 404.0486  | 54.0684   |
| 9  | 454.0701  | 40.2362   |
| 10 | 466.9056  | 26.7036   |
| 11 | 563.2971  | 3.8239    |
| 12 | 676.9683  | 16.0498   |
| 13 | 804.7402  | 2.7937    |
| 14 | 805.7403  | 39.1850   |
| 15 | 830.2722  | 68.3916   |
| 16 | 1100.7235 | 126.8496  |
| 17 | 1159.2959 | 6.7422    |
| 18 | 1243.3951 | 54.1358   |
| 19 | 1290.2731 | 281.0922  |
| 20 | 1351.8581 | 962.2876  |
| 21 | 1417.9748 | 118.5278  |
| 22 | 1602.1792 | 51.8365   |
| 23 | 1627.7347 | 14.2661   |
| 24 | 1709.3027 | 176.5732  |
| 25 | 1778.4412 | 286.0028  |
| 26 | 2159.1216 | 2535.8360 |
| 27 | 3318.7973 | 191.2303  |
| 28 | 3387.1407 | 29.0618   |
| 29 | 3505.4038 | 63.0965   |
| 30 | 3531.4357 | 19.3314   |

**$(\text{H}_2\text{C}_2\text{O}_4)(\text{NH}_3)_2$**

**Isomer II -a**

| # | Frequency | Infrared |
|---|-----------|----------|
| 1 | 34.0819   | 0.5583   |
| 2 | 48.7033   | 3.6493   |
| 3 | 102.9048  | 9.3616   |

|    |           |           |
|----|-----------|-----------|
| 4  | 118.5109  | 1.1434    |
| 5  | 136.5841  | 6.6471    |
| 6  | 153.7197  | 0.3830    |
| 7  | 218.1095  | 212.3303  |
| 8  | 247.4513  | 57.9967   |
| 9  | 277.5922  | 37.0712   |
| 10 | 331.1091  | 19.7966   |
| 11 | 365.7070  | 331.5716  |
| 12 | 432.0672  | 146.5207  |
| 13 | 453.3256  | 39.9725   |
| 14 | 459.4173  | 46.9253   |
| 15 | 529.9556  | 70.9714   |
| 16 | 566.6357  | 22.0985   |
| 17 | 649.8279  | 53.1776   |
| 18 | 710.4576  | 25.3195   |
| 19 | 815.7582  | 0.0665    |
| 20 | 830.0247  | 405.1392  |
| 21 | 905.4763  | 65.6645   |
| 22 | 926.5383  | 2395.8764 |
| 23 | 1095.3754 | 128.8981  |
| 24 | 1162.1261 | 24.9438   |
| 25 | 1317.1311 | 274.4419  |
| 26 | 1387.5001 | 850.3657  |
| 27 | 1398.9225 | 191.5563  |
| 28 | 1468.8575 | 54.7261   |
| 29 | 1557.4319 | 76.7007   |
| 30 | 1606.4451 | 3.5676    |
| 31 | 1633.2623 | 22.5701   |
| 32 | 1653.7630 | 2.3304    |
| 33 | 1686.1579 | 14.2787   |
| 34 | 1702.8752 | 40.2984   |
| 35 | 1762.4982 | 620.4962  |
| 36 | 2883.5507 | 977.4470  |

**Isomer II -b**

| # | Frequency | Infrared |
|---|-----------|----------|
| 1 | 23.7543   | 0.9853   |
| 2 | 60.1893   | 3.7875   |
| 3 | 62.3723   | 13.9107  |
| 4 | 86.7288   | 1.4115   |
| 5 | 92.4425   | 0.6471   |
| 6 | 113.9280  | 1.2616   |
| 7 | 123.4659  | 0.1295   |
| 8 | 159.7286  | 3.9091   |

|    |           |           |
|----|-----------|-----------|
| 9  | 221.0159  | 78.6009   |
| 10 | 230.3106  | 53.4120   |
| 11 | 304.0925  | 31.9466   |
| 12 | 335.7942  | 55.2103   |
| 13 | 365.2592  | 5.1808    |
| 14 | 401.1382  | 46.2821   |
| 15 | 452.8805  | 41.3009   |
| 16 | 463.5217  | 24.0510   |
| 17 | 554.6122  | 2.7968    |
| 18 | 681.0863  | 18.6156   |
| 19 | 799.7355  | 7.1118    |
| 20 | 808.4839  | 74.3890   |
| 21 | 824.4557  | 27.8519   |
| 22 | 892.4638  | 395.2869  |
| 23 | 1100.3411 | 119.5089  |
| 24 | 1154.4212 | 10.4309   |
| 25 | 1239.4348 | 52.8893   |
| 26 | 1265.6899 | 487.1278  |
| 27 | 1323.1951 | 694.6013  |
| 28 | 1394.0764 | 276.1253  |
| 29 | 1602.1715 | 53.2291   |
| 30 | 1607.6708 | 21.9863   |
| 31 | 1617.0971 | 9.0174    |
| 32 | 1626.7860 | 14.4563   |
| 33 | 1710.4210 | 223.7897  |
| 34 | 1771.0716 | 319.9579  |
| 35 | 2180.7979 | 2621.3160 |
| 36 | 3337.7566 | 412.1739  |

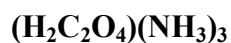

**Isomers III -a**

| #  | Frequency | Infrared |
|----|-----------|----------|
| 1  | 23.6157   | 0.5384   |
| 2  | 38.1832   | 2.5363   |
| 3  | 58.6758   | 1.1846   |
| 4  | 74.3800   | 1.9637   |
| 5  | 95.2867   | 15.9394  |
| 6  | 123.7547  | 6.1198   |
| 7  | 146.9582  | 15.6465  |
| 8  | 169.1824  | 0.4667   |
| 9  | 169.5759  | 2.1406   |
| 10 | 190.7888  | 32.2758  |
| 11 | 254.7892  | 33.5930  |
| 12 | 264.0591  | 4.5928   |

|    |           |           |
|----|-----------|-----------|
| 13 | 280.1022  | 81.4291   |
| 14 | 317.6402  | 66.3626   |
| 15 | 337.2363  | 96.8838   |
| 16 | 407.9517  | 54.7801   |
| 17 | 422.0989  | 82.6110   |
| 18 | 434.6766  | 72.5817   |
| 19 | 461.3334  | 42.0473   |
| 20 | 503.4232  | 55.6462   |
| 21 | 534.9526  | 14.8941   |
| 22 | 560.9694  | 15.3299   |
| 23 | 668.2892  | 21.7170   |
| 24 | 701.7214  | 22.9661   |
| 25 | 817.7463  | 0.1175    |
| 26 | 836.1056  | 19.0621   |
| 27 | 918.4723  | 62.3292   |
| 28 | 1108.3787 | 151.1903  |
| 29 | 1116.4079 | 109.2839  |
| 30 | 1161.5437 | 10.7813   |
| 31 | 1302.3077 | 254.3519  |
| 32 | 1341.2822 | 145.4796  |
| 33 | 1396.7347 | 419.6148  |
| 34 | 1484.8197 | 137.2037  |
| 35 | 1556.2864 | 100.3096  |
| 36 | 1605.7821 | 5.3874    |
| 37 | 1611.0145 | 7.0428    |
| 38 | 1635.2842 | 15.6756   |
| 39 | 1636.2869 | 12.2767   |
| 40 | 1647.7898 | 367.4619  |
| 41 | 1690.4177 | 10.8249   |
| 42 | 1706.2542 | 96.9136   |
| 43 | 1761.4996 | 598.0327  |
| 44 | 2329.4522 | 1761.0912 |
| 45 | 2829.1880 | 1060.6129 |
| 46 | 3039.9354 | 692.8696  |
| 47 | 3118.6653 | 310.5831  |
| 48 | 3334.5130 | 118.3275  |
| 49 | 3345.9286 | 162.8398  |
| 50 | 3470.1700 | 43.2933   |
| 51 | 3476.0821 | 74.3431   |
| 52 | 3491.0803 | 41.1614   |
| 53 | 3518.2041 | 7.5071    |
| 54 | 3521.4804 | 8.7004    |

**Isomer III -b**

| #  | Frequency | Infrared |
|----|-----------|----------|
| 1  | 36.1552   | 1.1654   |
| 2  | 37.9014   | 0.8733   |
| 3  | 52.3526   | 3.0289   |
| 4  | 93.0206   | 6.8536   |
| 5  | 110.0933  | 7.4619   |
| 6  | 115.6663  | 9.3122   |
| 7  | 136.1146  | 9.9338   |
| 8  | 160.5095  | 0.0023   |
| 9  | 164.3021  | 0.3204   |
| 10 | 228.6896  | 25.9476  |
| 11 | 234.9022  | 37.3329  |
| 12 | 263.0189  | 8.5064   |
| 13 | 283.7368  | 73.5135  |
| 14 | 321.0321  | 79.8023  |
| 15 | 335.4408  | 52.6010  |
| 16 | 343.1899  | 165.9604 |
| 17 | 407.2497  | 55.3452  |
| 18 | 429.1798  | 42.5605  |
| 19 | 460.1575  | 37.6750  |
| 20 | 541.0406  | 10.5113  |
| 21 | 550.7796  | 30.0993  |
| 22 | 586.1051  | 4.2399   |
| 23 | 698.6827  | 23.4598  |
| 24 | 721.3028  | 2.8091   |
| 25 | 818.8728  | 0.0728   |
| 26 | 831.0933  | 30.2835  |
| 27 | 971.6006  | 58.6969  |
| 28 | 1092.9563 | 101.4547 |
| 29 | 1097.3521 | 137.2847 |
| 30 | 1160.8486 | 4.6805   |
| 31 | 1310.3881 | 262.0445 |
| 32 | 1374.4985 | 8.7597   |
| 33 | 1404.6588 | 561.8824 |
| 34 | 1459.4864 | 24.4666  |
| 35 | 1562.9331 | 103.2517 |
| 36 | 1606.6782 | 6.8698   |
| 37 | 1617.0924 | 1.5107   |
| 38 | 1630.8242 | 0.3630   |
| 39 | 1636.7258 | 12.4443  |
| 40 | 1644.5220 | 365.9712 |
| 41 | 1699.8555 | 19.7955  |

|    |           |           |
|----|-----------|-----------|
| 42 | 1712.8375 | 20.6037   |
| 43 | 1742.6873 | 694.3962  |
| 44 | 2174.1206 | 2098.0669 |
| 45 | 2927.7398 | 1187.4281 |
| 46 | 2932.4706 | 494.3409  |
| 47 | 2974.6728 | 402.8881  |
| 48 | 3360.8341 | 67.9945   |
| 49 | 3363.8486 | 75.7059   |
| 50 | 3481.2171 | 47.9862   |
| 51 | 3482.7766 | 60.3465   |
| 52 | 3490.1901 | 35.7261   |
| 53 | 3521.2812 | 2.9189    |
| 54 | 3521.3596 | 15.5016   |

**Isomer III -c**

| #  | Frequency | Infrared |
|----|-----------|----------|
| 1  | 26.3797   | 0.4371   |
| 2  | 29.2068   | 0.5280   |
| 3  | 48.7525   | 0.4972   |
| 4  | 86.7782   | 6.8536   |
| 5  | 110.6076  | 2.5557   |
| 6  | 139.3215  | 2.4364   |
| 7  | 160.7986  | 6.4893   |
| 8  | 183.5757  | 9.0068   |
| 9  | 193.9680  | 13.3429  |
| 10 | 235.4777  | 20.4909  |
| 11 | 254.2368  | 47.1679  |
| 12 | 278.2122  | 80.1851  |
| 13 | 284.5840  | 33.1473  |
| 14 | 338.8545  | 133.4115 |
| 15 | 368.8162  | 47.1860  |
| 16 | 393.6457  | 35.4736  |
| 17 | 411.0955  | 22.7497  |
| 18 | 439.9070  | 27.5216  |
| 19 | 461.7016  | 38.8034  |
| 20 | 512.9281  | 23.7826  |
| 21 | 548.7023  | 69.9276  |
| 22 | 566.4323  | 23.1744  |
| 23 | 664.9168  | 9.0304   |
| 24 | 700.3995  | 30.5648  |
| 25 | 817.2880  | 0.2236   |
| 26 | 832.1459  | 22.7186  |
| 27 | 913.5943  | 63.5179  |
| 28 | 1126.3488 | 67.0602  |

|    |           |           |
|----|-----------|-----------|
| 29 | 1162.2154 | 11.5185   |
| 30 | 1177.5882 | 112.3460  |
| 31 | 1276.2758 | 281.9155  |
| 32 | 1327.6157 | 252.4142  |
| 33 | 1396.3852 | 467.3841  |
| 34 | 1483.9374 | 76.7732   |
| 35 | 1544.0872 | 460.3859  |
| 36 | 1601.7397 | 5.8456    |
| 37 | 1616.3401 | 26.7089   |
| 38 | 1636.9675 | 147.9159  |
| 39 | 1643.9800 | 225.9292  |
| 40 | 1659.0502 | 24.6949   |
| 41 | 1682.1875 | 15.5606   |
| 42 | 1693.6765 | 128.4820  |
| 43 | 1756.5216 | 319.8691  |
| 44 | 2159.4467 | 1709.2701 |
| 45 | 2654.2237 | 1330.1257 |
| 46 | 3091.3292 | 585.3829  |
| 47 | 3139.4970 | 292.4570  |
| 48 | 3306.4748 | 224.4274  |
| 49 | 3346.7521 | 186.3060  |
| 50 | 3443.7017 | 22.2300   |
| 51 | 3456.7748 | 53.3056   |
| 52 | 3501.6051 | 52.1958   |
| 53 | 3509.7215 | 4.7959    |
| 54 | 3512.3631 | 7.0816    |

**Isomer III -d**

| #  | Frequency | Infrared |
|----|-----------|----------|
| 1  | 26.3494   | 0.4353   |
| 2  | 29.1683   | 0.5299   |
| 3  | 48.7344   | 0.4961   |
| 4  | 86.7707   | 6.8536   |
| 5  | 110.6161  | 2.5512   |
| 6  | 139.3268  | 2.4346   |
| 7  | 160.7991  | 6.4969   |
| 8  | 183.5702  | 9.0272   |
| 9  | 194.0035  | 13.3469  |
| 10 | 235.4656  | 20.4669  |
| 11 | 254.2462  | 47.1526  |
| 12 | 278.2289  | 79.9033  |
| 13 | 284.5847  | 33.4770  |
| 14 | 338.8394  | 133.3446 |
| 15 | 368.8119  | 47.2362  |

|    |           |           |
|----|-----------|-----------|
| 16 | 393.6326  | 35.3556   |
| 17 | 411.1244  | 22.8217   |
| 18 | 439.8973  | 27.5347   |
| 19 | 461.6876  | 38.8108   |
| 20 | 512.9496  | 23.7521   |
| 21 | 548.7158  | 69.9188   |
| 22 | 566.4416  | 23.1908   |
| 23 | 664.9238  | 9.0277    |
| 24 | 700.3901  | 30.5605   |
| 25 | 817.2838  | 0.2237    |
| 26 | 832.1284  | 22.7222   |
| 27 | 913.5659  | 63.5108   |
| 28 | 1126.3754 | 67.0563   |
| 29 | 1162.2484 | 11.5146   |
| 30 | 1177.6041 | 112.3338  |
| 31 | 1276.3330 | 281.9247  |
| 32 | 1327.6332 | 252.0583  |
| 33 | 1396.4135 | 467.6498  |
| 34 | 1483.9158 | 76.6685   |
| 35 | 1544.1032 | 460.1305  |
| 36 | 1601.7292 | 5.8400    |
| 37 | 1616.3393 | 26.6588   |
| 38 | 1636.9863 | 147.1300  |
| 39 | 1644.0085 | 226.4954  |
| 40 | 1659.0567 | 24.7472   |
| 41 | 1682.1991 | 15.5733   |
| 42 | 1693.6828 | 128.4626  |
| 43 | 1756.5335 | 320.0269  |
| 44 | 2159.8740 | 1709.2355 |
| 45 | 2653.9191 | 1330.4064 |
| 46 | 3091.2243 | 585.6150  |
| 47 | 3139.5336 | 292.5108  |
| 48 | 3306.3851 | 224.6757  |
| 49 | 3346.7025 | 186.3619  |
| 50 | 3443.7153 | 22.2229   |
| 51 | 3456.7639 | 53.2892   |
| 52 | 3501.6157 | 52.1923   |
| 53 | 3509.7268 | 4.7974    |
| 54 | 3512.3816 | 7.0811    |

**Isomer III -e**

| # | Frequency | Infrared |
|---|-----------|----------|
| 1 | 23.5957   | 0.5371   |
| 2 | 38.1444   | 2.5375   |



|    |           |           |
|----|-----------|-----------|
| 3  | 58.6936   | 1.1876    |
| 4  | 74.3720   | 1.9621    |
| 5  | 95.2825   | 15.9454   |
| 6  | 123.7104  | 6.1136    |
| 7  | 146.9691  | 15.6569   |
| 8  | 169.2429  | 0.4030    |
| 9  | 169.5347  | 2.1933    |
| 10 | 190.7583  | 32.2593   |
| 11 | 254.7846  | 33.6364   |
| 12 | 264.0951  | 4.5493    |
| 13 | 280.0918  | 81.4136   |
| 14 | 317.6563  | 66.4335   |
| 15 | 337.2590  | 96.8141   |
| 16 | 407.9730  | 54.7746   |
| 17 | 422.1086  | 82.8657   |
| 18 | 434.6675  | 72.4054   |
| 19 | 461.3329  | 42.0215   |
| 20 | 503.3988  | 55.7035   |
| 21 | 534.9656  | 14.8204   |
| 22 | 560.9673  | 15.3433   |
| 23 | 668.2856  | 21.7174   |
| 24 | 701.7322  | 22.9751   |
| 25 | 817.7456  | 0.1176    |
| 26 | 836.1458  | 19.0566   |
| 27 | 918.3766  | 62.3355   |
| 28 | 1108.4645 | 151.3555  |
| 29 | 1116.4298 | 109.0836  |
| 30 | 1161.5257 | 10.7970   |
| 31 | 1302.3113 | 254.5115  |
| 32 | 1341.2835 | 145.8907  |
| 33 | 1396.7019 | 418.9475  |
| 34 | 1484.8448 | 137.1268  |
| 35 | 1556.2674 | 100.3269  |
| 36 | 1605.7998 | 5.4256    |
| 37 | 1611.0230 | 7.0353    |
| 38 | 1635.2850 | 15.6035   |
| 39 | 1636.2939 | 12.2986   |
| 40 | 1647.8038 | 367.9307  |
| 41 | 1690.4200 | 10.8074   |
| 42 | 1706.2512 | 96.9246   |
| 43 | 1761.5483 | 597.8143  |
| 44 | 2329.1239 | 1761.5930 |
| 45 | 2829.2779 | 1060.5276 |
| 46 | 3040.2706 | 692.3640  |

|    |           |          |
|----|-----------|----------|
| 47 | 3118.9328 | 310.4401 |
| 48 | 3334.5451 | 118.1404 |
| 49 | 3345.8832 | 162.8242 |
| 50 | 3470.1384 | 43.2710  |
| 51 | 3476.0107 | 74.3504  |
| 52 | 3491.0381 | 41.1669  |
| 53 | 3518.1485 | 7.5026   |
| 54 | 3521.3943 | 8.6981   |

**Isomer III -f**

| #  | Frequency | Infrared |
|----|-----------|----------|
| 1  | 17.7423   | 6.4869   |
| 2  | 24.7778   | 0.8956   |
| 3  | 68.6965   | 7.2596   |
| 4  | 75.3435   | 1.6088   |
| 5  | 105.9656  | 9.3604   |
| 6  | 138.1399  | 20.2005  |
| 7  | 140.2624  | 0.3143   |
| 8  | 162.0524  | 11.9927  |
| 9  | 169.3119  | 16.6579  |
| 10 | 186.5878  | 28.2657  |
| 11 | 211.8074  | 40.6778  |
| 12 | 221.4778  | 73.1895  |
| 13 | 275.1553  | 19.3784  |
| 14 | 287.7843  | 46.9856  |
| 15 | 316.7730  | 87.0738  |
| 16 | 332.5001  | 8.6836   |
| 17 | 375.7407  | 50.7636  |
| 18 | 411.6553  | 11.3513  |
| 19 | 421.3836  | 48.6585  |
| 20 | 458.5889  | 73.4909  |
| 21 | 475.4089  | 49.5589  |
| 22 | 584.6260  | 18.6825  |
| 23 | 619.5478  | 17.6691  |
| 24 | 697.1838  | 152.7362 |
| 25 | 812.2074  | 0.0999   |
| 26 | 824.4329  | 25.8846  |
| 27 | 1065.4458 | 210.5133 |
| 28 | 1073.7495 | 105.0854 |
| 29 | 1172.7923 | 54.8125  |
| 30 | 1194.4934 | 12.8514  |
| 31 | 1237.2297 | 174.8288 |
| 32 | 1288.8311 | 482.1148 |
| 33 | 1305.4744 | 515.7823 |

|    |           |           |
|----|-----------|-----------|
| 34 | 1330.2716 | 1323.4037 |
| 35 | 1379.4558 | 51.1826   |
| 36 | 1597.3839 | 55.2564   |
| 37 | 1599.5585 | 23.3405   |

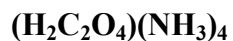

**Isomer IV -a**

| #  | Frequency | Infrared |
|----|-----------|----------|
| 1  | 30.0860   | 2.0029   |
| 2  | 38.0570   | 0.1052   |
| 3  | 43.3866   | 0.6940   |
| 4  | 48.3684   | 4.0551   |
| 5  | 72.0286   | 8.3420   |
| 6  | 86.5318   | 11.5681  |
| 7  | 93.5133   | 13.0057  |
| 8  | 100.4430  | 17.9648  |
| 9  | 125.2498  | 4.0463   |
| 10 | 155.0059  | 1.9942   |
| 11 | 160.8959  | 0.3208   |
| 12 | 163.5869  | 0.0009   |
| 13 | 167.5501  | 0.5696   |
| 14 | 210.6129  | 7.8864   |
| 15 | 242.3439  | 54.3848  |
| 16 | 245.2973  | 1.6217   |
| 17 | 253.3611  | 0.3073   |
| 18 | 293.5203  | 33.3450  |
| 19 | 304.2290  | 59.5707  |
| 20 | 325.1823  | 132.5570 |
| 21 | 360.9480  | 133.6781 |
| 22 | 398.8287  | 27.8711  |
| 23 | 421.6912  | 5.0030   |
| 24 | 449.7280  | 223.7948 |
| 25 | 462.3852  | 40.5778  |
| 26 | 554.8640  | 17.9118  |
| 27 | 578.2267  | 0.1572   |
| 28 | 590.2292  | 4.9660   |
| 29 | 639.1430  | 2.3061   |
| 30 | 695.8892  | 20.3205  |
| 31 | 819.4855  | 0.0375   |
| 32 | 827.3897  | 20.7952  |
| 33 | 959.3050  | 58.9276  |
| 34 | 1090.5415 | 89.8909  |
| 35 | 1095.1663 | 167.4559 |
| 36 | 1107.9073 | 111.6461 |

|    |           |           |
|----|-----------|-----------|
| 37 | 1160.9645 | 7.3260    |
| 38 | 1315.7301 | 189.6124  |
| 39 | 1354.2647 | 59.1227   |
| 40 | 1402.4630 | 563.3938  |
| 41 | 1504.4580 | 13.3898   |
| 42 | 1538.2823 | 115.8216  |
| 43 | 1608.5710 | 7.8260    |
| 44 | 1614.7602 | 4.6743    |
| 45 | 1616.4506 | 5.8898    |
| 46 | 1630.7947 | 0.5188    |
| 47 | 1636.1136 | 6.0565    |
| 48 | 1637.1671 | 21.6604   |
| 49 | 1661.5348 | 245.5089  |
| 50 | 1697.5319 | 38.4245   |
| 51 | 1718.9951 | 71.8865   |
| 52 | 1745.2299 | 689.4366  |
| 53 | 2551.5664 | 1495.4535 |
| 54 | 3021.1543 | 214.9796  |
| 55 | 3036.8513 | 471.3383  |
| 56 | 3059.1679 | 852.4991  |
| 57 | 3224.8377 | 595.8577  |
| 58 | 3347.7219 | 112.7712  |
| 59 | 3359.6077 | 66.5718   |
| 60 | 3362.6814 | 77.8313   |
| 61 | 3472.5310 | 43.9376   |
| 62 | 3480.1730 | 39.7371   |
| 63 | 3481.7673 | 62.4752   |
| 64 | 3515.9189 | 5.5367    |
| 65 | 3519.8942 | 3.2118    |
| 66 | 3519.9885 | 12.0112   |

**Isomer IV -b**

| #  | Frequency | Infrared |
|----|-----------|----------|
| 1  | 20.0634   | 0.0779   |
| 2  | 33.8567   | 0.1684   |
| 3  | 46.0864   | 1.5407   |
| 4  | 51.3790   | 4.9147   |
| 5  | 72.9002   | 14.1899  |
| 6  | 81.9636   | 4.5417   |
| 7  | 84.2564   | 16.0332  |
| 8  | 122.4650  | 20.9475  |
| 9  | 125.8509  | 1.7954   |
| 10 | 157.2582  | 0.1363   |
| 11 | 161.7641  | 1.2338   |

|    |           |           |
|----|-----------|-----------|
| 12 | 165.2628  | 0.0747    |
| 13 | 167.4221  | 0.0041    |
| 14 | 198.1022  | 8.3674    |
| 15 | 232.9433  | 10.1923   |
| 16 | 245.9331  | 7.9400    |
| 17 | 275.4073  | 50.8235   |
| 18 | 298.0708  | 71.9071   |
| 19 | 314.7296  | 97.0385   |
| 20 | 322.2289  | 37.3715   |
| 21 | 381.8659  | 41.4650   |
| 22 | 395.8423  | 127.0625  |
| 23 | 419.2374  | 5.3626    |
| 24 | 460.6478  | 44.5234   |
| 25 | 460.8649  | 228.3654  |
| 26 | 553.9862  | 0.4436    |
| 27 | 556.2734  | 17.3343   |
| 28 | 576.1372  | 5.7737    |
| 29 | 587.4079  | 0.6131    |
| 30 | 692.2911  | 20.9047   |
| 31 | 819.5801  | 0.0256    |
| 32 | 828.0317  | 19.5292   |
| 33 | 922.2079  | 60.7466   |
| 34 | 1100.5662 | 85.2822   |
| 35 | 1103.3629 | 261.8435  |
| 36 | 1106.0473 | 26.0561   |
| 37 | 1159.7073 | 12.6874   |
| 38 | 1314.4870 | 268.7628  |
| 39 | 1358.6398 | 91.7485   |
| 40 | 1396.3980 | 466.9774  |
| 41 | 1506.0963 | 142.9232  |
| 42 | 1523.6234 | 27.1989   |
| 43 | 1608.8451 | 0.6884    |
| 44 | 1608.8863 | 4.5633    |
| 45 | 1616.5371 | 5.7094    |
| 46 | 1631.2858 | 1.1978    |
| 47 | 1637.5951 | 25.2704   |
| 48 | 1638.0737 | 7.1644    |
| 49 | 1653.6646 | 268.7841  |
| 50 | 1704.2238 | 103.1601  |
| 51 | 1705.8731 | 66.9804   |
| 52 | 1763.7416 | 575.8894  |
| 53 | 2738.5489 | 1123.4895 |
| 54 | 2945.4856 | 819.4620  |
| 55 | 3127.5863 | 203.7781  |

|    |           |          |
|----|-----------|----------|
| 56 | 3142.0439 | 625.3624 |
| 57 | 3176.5581 | 569.2311 |
| 58 | 3343.2462 | 84.1008  |
| 59 | 3346.5535 | 96.1359  |
| 60 | 3359.3976 | 136.1691 |
| 61 | 3471.7857 | 28.6452  |
| 62 | 3473.0271 | 49.4357  |
| 63 | 3480.6063 | 80.3215  |
| 64 | 3516.7481 | 3.7659   |
| 65 | 3516.8411 | 8.9845   |
| 66 | 3520.6934 | 7.4638   |

**Isomer IV -c**

| #  | Frequency | Infrared |
|----|-----------|----------|
| 1  | 17.2338   | 0.2037   |
| 2  | 28.6218   | 0.7415   |
| 3  | 36.2085   | 1.9066   |
| 4  | 58.9847   | 1.5631   |
| 5  | 68.1731   | 2.3659   |
| 6  | 84.8266   | 3.8304   |
| 7  | 115.6961  | 2.4043   |
| 8  | 138.5151  | 10.2607  |
| 9  | 148.0275  | 15.5892  |
| 10 | 169.3817  | 0.1584   |
| 11 | 195.4317  | 13.4805  |
| 12 | 199.9046  | 19.0138  |
| 13 | 221.3291  | 22.2591  |
| 14 | 242.5993  | 7.0595   |
| 15 | 256.3226  | 45.3119  |
| 16 | 271.3183  | 83.4069  |
| 17 | 278.9396  | 41.2617  |
| 18 | 310.3084  | 41.8446  |
| 19 | 319.4183  | 44.1284  |
| 20 | 391.1781  | 48.1035  |
| 21 | 412.6104  | 12.5016  |
| 22 | 430.9980  | 46.2094  |
| 23 | 440.0846  | 96.5205  |
| 24 | 463.4689  | 50.3321  |
| 25 | 513.8833  | 11.4393  |
| 26 | 536.0070  | 5.2870   |
| 27 | 564.5684  | 18.4801  |
| 28 | 588.0472  | 88.9389  |
| 29 | 693.5172  | 28.1030  |
| 30 | 746.4401  | 13.5014  |

|    |           |           |
|----|-----------|-----------|
| 31 | 817.3705  | 0.0429    |
| 32 | 835.8482  | 19.9191   |
| 33 | 918.0988  | 61.6335   |
| 34 | 1102.3093 | 128.3685  |
| 35 | 1134.5040 | 57.7882   |
| 36 | 1158.6762 | 15.5380   |
| 37 | 1179.9092 | 103.2521  |
| 38 | 1318.1028 | 356.0762  |
| 39 | 1396.9915 | 464.7286  |
| 40 | 1406.1995 | 12.8163   |
| 41 | 1488.7116 | 53.8479   |
| 42 | 1555.0254 | 27.7187   |
| 43 | 1602.3508 | 12.6667   |
| 44 | 1607.9415 | 6.8519    |
| 45 | 1619.1153 | 7.9142    |
| 46 | 1636.6037 | 10.4266   |
| 47 | 1644.7945 | 11.1619   |
| 48 | 1655.8193 | 374.3872  |
| 49 | 1662.1993 | 19.7608   |
| 50 | 1712.9666 | 8.6191    |
| 51 | 1722.8311 | 50.9731   |
| 52 | 1761.9251 | 520.1342  |
| 53 | 2470.1225 | 1824.2496 |
| 54 | 2733.8702 | 1387.5749 |
| 55 | 2882.3171 | 968.4105  |
| 56 | 3074.0042 | 658.6470  |
| 57 | 3118.2904 | 325.9099  |
| 58 | 3269.3340 | 391.1332  |
| 59 | 3347.6967 | 147.3372  |
| 60 | 3441.0850 | 19.5107   |
| 61 | 3451.9427 | 50.8450   |
| 62 | 3477.0309 | 69.5837   |
| 63 | 3481.4370 | 33.4029   |
| 64 | 3509.9771 | 1.3067    |
| 65 | 3510.1808 | 7.3757    |
| 66 | 3521.8364 | 7.8177    |

**Isomer IV -d**

| # | Frequency | Infrared |
|---|-----------|----------|
| 1 | 24.7315   | 0.2439   |
| 2 | 28.4794   | 0.9035   |
| 3 | 36.6234   | 0.9438   |
| 4 | 50.2840   | 2.5109   |
| 5 | 61.5690   | 4.0336   |

|    |           |          |
|----|-----------|----------|
| 6  | 99.8358   | 3.7405   |
| 7  | 116.5001  | 2.3998   |
| 8  | 122.3506  | 6.9555   |
| 9  | 150.4269  | 8.8709   |
| 10 | 172.0854  | 3.7674   |
| 11 | 175.7038  | 2.4482   |
| 12 | 185.0690  | 17.9205  |
| 13 | 213.5207  | 2.9483   |
| 14 | 237.8359  | 45.7686  |
| 15 | 251.1536  | 38.2301  |
| 16 | 259.0334  | 8.4269   |
| 17 | 288.3967  | 18.6570  |
| 18 | 304.2934  | 74.0730  |
| 19 | 317.7675  | 110.7847 |
| 20 | 360.1156  | 39.3395  |
| 21 | 381.7254  | 95.5860  |
| 22 | 404.9450  | 78.8239  |
| 23 | 416.0561  | 10.3612  |
| 24 | 462.0430  | 43.6641  |
| 25 | 499.0844  | 22.0182  |
| 26 | 541.6735  | 38.5152  |
| 27 | 572.4623  | 7.6384   |
| 28 | 604.3684  | 28.0422  |
| 29 | 697.8095  | 24.3115  |
| 30 | 740.5610  | 2.6271   |
| 31 | 819.6033  | 2.4853   |
| 32 | 830.9637  | 29.4001  |
| 33 | 981.7184  | 56.7465  |
| 34 | 1089.5424 | 84.0220  |
| 35 | 1100.5096 | 114.8841 |
| 36 | 1156.3441 | 6.9552   |
| 37 | 1170.6220 | 91.4416  |
| 38 | 1315.4149 | 210.6436 |
| 39 | 1401.8348 | 410.9611 |
| 40 | 1413.9353 | 175.6371 |
| 41 | 1472.9010 | 28.4218  |
| 42 | 1551.8431 | 54.7116  |
| 43 | 1605.6990 | 2.6223   |
| 44 | 1609.7601 | 8.1343   |
| 45 | 1621.5352 | 7.1554   |
| 46 | 1632.7703 | 3.0190   |
| 47 | 1641.8075 | 16.1477  |
| 48 | 1655.4665 | 265.1168 |
| 49 | 1657.9838 | 0.7264   |



|    |           |           |
|----|-----------|-----------|
| 50 | 1712.4539 | 20.6890   |
| 51 | 1718.5100 | 32.1843   |
| 52 | 1742.6802 | 722.3806  |
| 53 | 2317.8308 | 2118.9780 |
| 54 | 2746.5087 | 1290.6776 |
| 55 | 2934.6547 | 191.5768  |
| 56 | 2940.4692 | 982.1255  |
| 57 | 3140.8777 | 523.2682  |
| 58 | 3339.2132 | 144.0297  |
| 59 | 3354.3627 | 115.5388  |
| 60 | 3441.0514 | 24.5773   |
| 61 | 3467.5138 | 62.1400   |
| 62 | 3480.4364 | 67.1568   |
| 63 | 3481.7338 | 28.3895   |
| 64 | 3508.5376 | 5.2050    |
| 65 | 3512.9055 | 4.9789    |
| 66 | 3523.3262 | 7.9528    |

**Isomer IV -e**

| #  | Frequency | Infrared |
|----|-----------|----------|
| 1  | 17.8256   | 3.1918   |
| 2  | 23.8338   | 2.1860   |
| 3  | 27.5893   | 3.1478   |
| 4  | 70.6970   | 3.2494   |
| 5  | 77.6559   | 1.0284   |
| 6  | 96.9042   | 11.6174  |
| 7  | 102.1394  | 11.0958  |
| 8  | 129.5025  | 16.8624  |
| 9  | 148.8904  | 16.3942  |
| 10 | 169.9260  | 1.7548   |
| 11 | 177.0799  | 1.7801   |
| 12 | 190.3006  | 10.6255  |
| 13 | 195.8739  | 52.4544  |
| 14 | 222.4523  | 54.0256  |
| 15 | 225.9859  | 17.2518  |
| 16 | 246.8910  | 76.7820  |
| 17 | 284.2370  | 54.9460  |
| 18 | 293.0053  | 50.8092  |
| 19 | 303.8461  | 12.8024  |
| 20 | 321.1812  | 61.8861  |
| 21 | 332.6783  | 12.0859  |
| 22 | 397.5789  | 11.1130  |
| 23 | 417.9154  | 130.1515 |
| 24 | 440.8511  | 16.2803  |

|    |           |          |
|----|-----------|----------|
| 25 | 464.1399  | 49.5618  |
| 26 | 492.5511  | 34.8689  |
| 27 | 595.8062  | 38.4489  |
| 28 | 598.8274  | 5.6984   |
| 29 | 684.5942  | 89.3797  |
| 30 | 688.0176  | 110.3450 |
| 31 | 814.8322  | 2.1153   |
| 32 | 832.3183  | 9.2677   |
| 33 | 1077.8633 | 143.8367 |
| 34 | 1083.6730 | 104.3620 |
| 35 | 1189.3278 | 32.7419  |
| 36 | 1202.9113 | 42.8147  |

**Isomer IV -f**

| #  | Frequency | Infrared |
|----|-----------|----------|
| 1  | 25.6834   | 0.2531   |
| 2  | 29.7317   | 0.9884   |
| 3  | 46.4096   | 0.9682   |
| 4  | 54.1593   | 1.2131   |
| 5  | 86.1442   | 2.4630   |
| 6  | 99.0857   | 1.0160   |
| 7  | 113.9458  | 6.0893   |
| 8  | 137.2911  | 12.5994  |
| 9  | 148.2633  | 2.4514   |
| 10 | 154.1298  | 6.7788   |
| 11 | 157.7933  | 5.7624   |
| 12 | 172.8038  | 16.3268  |
| 13 | 181.9327  | 9.8259   |
| 14 | 223.4327  | 19.8600  |
| 15 | 240.9742  | 32.9975  |
| 16 | 270.8062  | 36.7513  |
| 17 | 291.0630  | 182.1298 |
| 18 | 315.3570  | 68.8328  |
| 19 | 342.7207  | 47.2035  |
| 20 | 358.7525  | 46.5398  |
| 21 | 368.7800  | 55.3584  |
| 22 | 422.0053  | 20.3336  |
| 23 | 428.7631  | 7.5309   |
| 24 | 463.8274  | 33.4627  |
| 25 | 471.3934  | 76.5037  |
| 26 | 537.7448  | 34.6687  |
| 27 | 566.7633  | 8.5765   |
| 28 | 662.3868  | 21.5519  |
| 29 | 697.5358  | 24.8936  |

|    |           |           |
|----|-----------|-----------|
| 30 | 736.9579  | 22.5215   |
| 31 | 820.2583  | 0.0803    |
| 32 | 827.5629  | 25.8613   |
| 33 | 946.6480  | 59.7244   |
| 34 | 1092.9013 | 88.6069   |
| 35 | 1110.0260 | 79.8560   |
| 36 | 1159.2324 | 8.7429    |
| 37 | 1184.8730 | 70.5406   |
| 38 | 1302.9984 | 304.1439  |
| 39 | 1346.9531 | 32.6156   |
| 40 | 1397.9684 | 512.1489  |
| 41 | 1435.3091 | 38.0953   |
| 42 | 1568.8929 | 204.1358  |
| 43 | 1600.8018 | 92.3312   |
| 44 | 1616.5656 | 16.2000   |
| 45 | 1619.5538 | 24.1089   |
| 46 | 1635.4623 | 7.5885    |
| 47 | 1641.2886 | 15.0215   |
| 48 | 1648.9603 | 275.3729  |
| 49 | 1658.0782 | 17.4160   |
| 50 | 1686.3877 | 183.8214  |
| 51 | 1705.5571 | 14.3959   |
| 52 | 1748.9420 | 435.3554  |
| 53 | 2084.7563 | 2025.9871 |
| 54 | 2391.7890 | 1465.2254 |
| 55 | 3060.5935 | 291.6021  |
| 56 | 3171.5378 | 267.4105  |
| 57 | 3247.8366 | 481.3321  |
| 58 | 3327.9864 | 158.1735  |
| 59 | 3362.2139 | 70.3361   |
| 60 | 3414.8394 | 41.0702   |
| 61 | 3461.8120 | 45.7522   |
| 62 | 3476.0535 | 53.5375   |
| 63 | 3498.2033 | 16.6186   |
| 64 | 3510.2531 | 4.0476    |
| 65 | 3511.9812 | 4.8009    |
| 66 | 3514.1161 | 47.9087   |

**Isomer IV -g**

| # | Frequency | Infrared |
|---|-----------|----------|
| 1 | 23.2530   | 4.4965   |
| 2 | 31.0526   | 0.2139   |
| 3 | 37.4817   | 2.4710   |
| 4 | 49.7013   | 2.4948   |

|    |           |           |
|----|-----------|-----------|
| 5  | 74.5781   | 3.4932    |
| 6  | 84.8831   | 4.0011    |
| 7  | 131.1492  | 10.9663   |
| 8  | 154.4471  | 6.0071    |
| 9  | 180.3623  | 1.3149    |
| 10 | 180.7348  | 9.2118    |
| 11 | 182.4868  | 18.6527   |
| 12 | 187.0732  | 13.2539   |
| 13 | 219.9010  | 35.3703   |
| 14 | 235.9502  | 22.0576   |
| 15 | 247.2107  | 124.9074  |
| 16 | 271.6140  | 162.4047  |
| 17 | 294.2061  | 12.6285   |
| 18 | 318.3077  | 37.7805   |
| 19 | 337.0562  | 17.5580   |
| 20 | 358.8526  | 25.3892   |
| 21 | 374.1863  | 79.7830   |
| 22 | 381.0088  | 53.6837   |
| 23 | 417.3431  | 58.5796   |
| 24 | 431.7676  | 330.7478  |
| 25 | 502.2065  | 49.9089   |
| 26 | 527.3479  | 2.4001    |
| 27 | 604.0256  | 61.5376   |
| 28 | 634.4093  | 27.9146   |
| 29 | 652.3445  | 10.4749   |
| 30 | 742.3324  | 24.6998   |
| 31 | 818.6019  | 0.3182    |
| 32 | 850.9863  | 17.5593   |
| 33 | 1054.8018 | 876.9907  |
| 34 | 1101.3185 | 1291.4192 |
| 35 | 1113.8890 | 260.1542  |
| 36 | 1167.1114 | 85.5118   |

**Isomer IV -h**

| # | Frequency | Infrared |
|---|-----------|----------|
| 1 | 10.9075   | 0.4404   |
| 2 | 27.2418   | 1.2086   |
| 3 | 28.5742   | 0.3447   |
| 4 | 44.0583   | 1.1862   |
| 5 | 64.1742   | 0.8114   |
| 6 | 81.9757   | 4.7561   |
| 7 | 113.7177  | 2.6102   |
| 8 | 128.7639  | 0.8456   |
| 9 | 163.9412  | 1.8356   |

|    |           |           |
|----|-----------|-----------|
| 10 | 172.1041  | 23.0869   |
| 11 | 181.6466  | 36.7092   |
| 12 | 201.7567  | 11.3873   |
| 13 | 219.6607  | 31.2276   |
| 14 | 246.1466  | 1.3413    |
| 15 | 256.1652  | 32.7646   |
| 16 | 278.6772  | 20.6080   |
| 17 | 296.4358  | 61.5105   |
| 18 | 332.9353  | 174.4259  |
| 19 | 356.0276  | 17.1022   |
| 20 | 382.2894  | 30.5876   |
| 21 | 384.4160  | 15.3933   |
| 22 | 422.7581  | 43.0257   |
| 23 | 436.7520  | 18.1280   |
| 24 | 462.6345  | 35.9386   |
| 25 | 491.1462  | 30.6029   |
| 26 | 541.8370  | 54.4248   |
| 27 | 563.0398  | 1.8994    |
| 28 | 583.6371  | 33.4355   |
| 29 | 659.6479  | 13.1218   |
| 30 | 701.5437  | 32.7290   |
| 31 | 816.6718  | 0.0591    |
| 32 | 831.8206  | 28.1640   |
| 33 | 920.5202  | 62.0583   |
| 34 | 1132.1345 | 49.0416   |
| 35 | 1163.0906 | 33.3983   |
| 36 | 1164.1095 | 58.2422   |
| 37 | 1204.7089 | 92.5538   |
| 38 | 1302.5512 | 376.1960  |
| 39 | 1345.8935 | 103.8417  |
| 40 | 1397.2796 | 522.9327  |
| 41 | 1467.2092 | 94.9037   |
| 42 | 1551.1771 | 356.3702  |
| 43 | 1603.0368 | 4.6227    |
| 44 | 1610.4563 | 47.9961   |
| 45 | 1622.1168 | 10.0827   |
| 46 | 1639.0086 | 134.1183  |
| 47 | 1649.3139 | 220.9401  |
| 48 | 1655.0391 | 28.3864   |
| 49 | 1669.6060 | 3.9651    |
| 50 | 1687.7479 | 98.9038   |
| 51 | 1692.2485 | 24.6514   |
| 52 | 1753.3367 | 325.4708  |
| 53 | 2296.7221 | 1887.8904 |

|    |           |           |
|----|-----------|-----------|
| 54 | 2553.7268 | 1489.6731 |
| 55 | 3024.9632 | 805.6342  |
| 56 | 3116.2900 | 295.6991  |
| 57 | 3129.3880 | 566.8046  |
| 58 | 3295.7456 | 269.6344  |
| 59 | 3305.7880 | 263.4320  |
| 60 | 3434.8803 | 14.0959   |
| 61 | 3435.2907 | 26.8607   |
| 62 | 3451.1541 | 56.9073   |
| 63 | 3497.0077 | 48.8272   |
| 64 | 3501.7031 | 2.1528    |
| 65 | 3504.6702 | 5.8764    |
| 66 | 3505.8366 | 3.6204    |

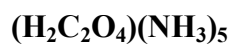

**Isomer V -a**

| #  | Frequency | Infrared |
|----|-----------|----------|
| 1  | 19.1243   | 0.0767   |
| 2  | 26.3206   | 0.4250   |
| 3  | 30.9918   | 0.7217   |
| 4  | 44.8118   | 1.3302   |
| 5  | 51.9964   | 2.9576   |
| 6  | 69.8007   | 5.1622   |
| 7  | 72.4017   | 2.1136   |
| 8  | 83.2442   | 13.3953  |
| 9  | 110.7938  | 3.8619   |
| 10 | 130.1991  | 16.6827  |
| 11 | 149.7477  | 8.9926   |
| 12 | 162.6032  | 0.5369   |
| 13 | 168.9254  | 0.2873   |
| 14 | 172.3427  | 1.7901   |
| 15 | 179.3810  | 13.0582  |
| 16 | 191.8943  | 16.0093  |
| 17 | 207.0913  | 5.6148   |
| 18 | 229.2559  | 3.2309   |
| 19 | 242.8935  | 19.6882  |
| 20 | 254.2026  | 31.5025  |
| 21 | 260.2990  | 47.4319  |
| 22 | 293.8511  | 55.1514  |
| 23 | 302.4731  | 23.9880  |
| 24 | 321.0442  | 73.5992  |
| 25 | 382.1257  | 11.8755  |
| 26 | 386.1622  | 75.6969  |
| 27 | 412.3114  | 31.6828  |

|    |           |           |
|----|-----------|-----------|
| 28 | 420.4660  | 48.0430   |
| 29 | 433.1900  | 153.9049  |
| 30 | 464.0177  | 48.6837   |
| 31 | 551.2280  | 105.1251  |
| 32 | 556.7826  | 10.4179   |
| 33 | 573.3745  | 21.8523   |
| 34 | 622.1657  | 0.7319    |
| 35 | 677.9500  | 14.0689   |
| 36 | 692.6525  | 14.2054   |
| 37 | 820.4501  | 0.1218    |
| 38 | 828.1736  | 20.3491   |
| 39 | 914.4015  | 60.1055   |
| 40 | 1094.8231 | 142.1652  |
| 41 | 1098.4473 | 100.1413  |
| 42 | 1130.6979 | 66.3926   |
| 43 | 1155.6924 | 22.5649   |
| 44 | 1160.3215 | 97.7059   |
| 45 | 1317.8568 | 320.7575  |
| 46 | 1392.9779 | 450.1416  |
| 47 | 1422.3074 | 57.3747   |
| 48 | 1513.3091 | 35.6847   |
| 49 | 1517.6173 | 81.2105   |
| 50 | 1604.1283 | 3.5636    |
| 51 | 1608.8157 | 2.4843    |
| 52 | 1612.3275 | 9.8884    |
| 53 | 1620.2005 | 18.7318   |
| 54 | 1632.5010 | 5.7828    |
| 55 | 1638.3981 | 8.2413    |
| 56 | 1645.0737 | 18.5369   |
| 57 | 1654.5888 | 295.9527  |
| 58 | 1661.1200 | 34.4376   |
| 59 | 1717.6383 | 56.5208   |
| 60 | 1723.3706 | 50.9549   |
| 61 | 1766.3019 | 517.7944  |
| 62 | 2839.1487 | 1242.4644 |
| 63 | 2871.2238 | 809.1901  |
| 64 | 2968.6778 | 942.2182  |
| 65 | 3120.5792 | 478.5668  |
| 66 | 3134.1523 | 315.1803  |
| 67 | 3159.3530 | 617.5125  |
| 68 | 3279.7872 | 310.1924  |
| 69 | 3347.0450 | 88.9497   |
| 70 | 3359.9955 | 141.9015  |
| 71 | 3444.2215 | 21.7719   |

|    |           |         |
|----|-----------|---------|
| 72 | 3451.4266 | 48.4270 |
| 73 | 3473.7331 | 40.3565 |
| 74 | 3481.5836 | 81.0790 |
| 75 | 3507.3027 | 3.3918  |
| 76 | 3512.2524 | 4.4920  |
| 77 | 3518.1972 | 6.0219  |
| 78 | 3521.8709 | 6.6499  |

**Isomer V -b**

| #  | Frequency | Infrared |
|----|-----------|----------|
| 1  | 16.5031   | 0.6652   |
| 2  | 30.6610   | 0.0488   |
| 3  | 39.4851   | 0.1096   |
| 4  | 48.3300   | 2.5028   |
| 5  | 56.3432   | 0.7770   |
| 6  | 63.3576   | 2.5735   |
| 7  | 82.4456   | 2.6515   |
| 8  | 112.5533  | 6.0204   |
| 9  | 116.8575  | 6.7645   |
| 10 | 136.1074  | 22.6967  |
| 11 | 155.7483  | 2.0875   |
| 12 | 164.9190  | 17.9250  |
| 13 | 183.7988  | 18.0453  |
| 14 | 192.3314  | 5.6705   |
| 15 | 195.4707  | 6.0795   |
| 16 | 196.6481  | 0.0179   |
| 17 | 208.7383  | 0.2879   |
| 18 | 208.7499  | 0.5865   |
| 19 | 225.3522  | 21.9433  |
| 20 | 261.0579  | 8.9580   |
| 21 | 277.8807  | 71.2480  |
| 22 | 288.4054  | 60.7805  |
| 23 | 291.9153  | 18.7960  |
| 24 | 335.0704  | 61.9387  |
| 25 | 366.9270  | 6.8606   |
| 26 | 377.9081  | 89.4725  |
| 27 | 413.3730  | 3.8726   |
| 28 | 422.1760  | 122.8741 |
| 29 | 461.0860  | 62.0998  |
| 30 | 462.7241  | 68.2159  |
| 31 | 541.7673  | 148.2424 |
| 32 | 565.0827  | 12.2511  |
| 33 | 619.3716  | 0.1097   |
| 34 | 643.9252  | 12.3871  |



|    |           |           |
|----|-----------|-----------|
| 35 | 672.9947  | 0.0221    |
| 36 | 695.8277  | 15.8192   |
| 37 | 816.2009  | 28.2761   |
| 38 | 820.4051  | 0.1087    |
| 39 | 993.3682  | 55.3961   |
| 40 | 1103.4423 | 81.5647   |
| 41 | 1109.2146 | 155.3805  |
| 42 | 1112.4105 | 75.0644   |
| 43 | 1149.6350 | 112.3759  |
| 44 | 1167.9700 | 0.7510    |
| 45 | 1311.6574 | 141.1704  |
| 46 | 1407.4811 | 633.8049  |
| 47 | 1456.9022 | 33.1847   |
| 48 | 1492.1809 | 17.5702   |
| 49 | 1515.5530 | 88.5348   |
| 50 | 1603.8356 | 5.3007    |
| 51 | 1606.6804 | 4.2378    |
| 52 | 1613.1697 | 2.3334    |
| 53 | 1620.4597 | 5.8447    |
| 54 | 1636.9934 | 0.5128    |
| 55 | 1638.2729 | 12.9628   |
| 56 | 1646.1792 | 19.4864   |
| 57 | 1657.8402 | 0.5607    |
| 58 | 1667.1483 | 98.5145   |
| 59 | 1721.1251 | 29.4371   |
| 60 | 1730.6107 | 599.2091  |
| 61 | 1735.7049 | 254.5895  |
| 62 | 2904.6298 | 889.8033  |
| 63 | 2905.9445 | 349.6459  |
| 64 | 2958.3134 | 898.5501  |
| 65 | 2966.1641 | 1125.6971 |
| 66 | 3036.1458 | 591.8952  |
| 67 | 3156.1709 | 558.3939  |
| 68 | 3288.9251 | 221.7967  |
| 69 | 3298.2904 | 283.1622  |
| 70 | 3341.9059 | 189.9704  |
| 71 | 3446.4318 | 25.9453   |
| 72 | 3462.7638 | 31.8871   |
| 73 | 3464.1165 | 49.6685   |
| 74 | 3466.5877 | 90.1874   |
| 75 | 3511.3460 | 3.9035    |
| 76 | 3513.0543 | 5.1714    |
| 77 | 3519.7956 | 3.4410    |
| 78 | 3519.9194 | 8.1569    |

**Isomer V -c**

| #  | Frequency | Infrared |
|----|-----------|----------|
| 1  | 16.7736   | 0.3434   |
| 2  | 24.8215   | 1.0064   |
| 3  | 27.6171   | 0.0108   |
| 4  | 31.3261   | 0.0628   |
| 5  | 45.6593   | 1.7370   |
| 6  | 67.6710   | 1.9504   |
| 7  | 78.4907   | 2.2418   |
| 8  | 104.7546  | 4.6554   |
| 9  | 119.6141  | 3.6590   |
| 10 | 135.7643  | 4.4391   |
| 11 | 164.5259  | 6.9507   |
| 12 | 172.7769  | 4.8722   |
| 13 | 179.0371  | 11.5661  |
| 14 | 186.5025  | 9.6063   |
| 15 | 188.0771  | 8.9276   |
| 16 | 220.9175  | 0.0927   |
| 17 | 224.4225  | 35.4773  |
| 18 | 235.9292  | 20.6614  |
| 19 | 245.1404  | 55.8551  |
| 20 | 252.9759  | 23.0432  |
| 21 | 275.3079  | 69.7872  |
| 22 | 306.1699  | 6.0034   |
| 23 | 308.9523  | 77.0976  |
| 24 | 365.4483  | 34.4518  |
| 25 | 385.1325  | 40.2370  |
| 26 | 387.8286  | 41.3111  |
| 27 | 397.3640  | 56.2991  |
| 28 | 423.8191  | 38.8045  |
| 29 | 464.4103  | 49.8907  |
| 30 | 473.0268  | 54.0325  |
| 31 | 517.6647  | 16.1124  |
| 32 | 558.9464  | 6.0333   |
| 33 | 584.3013  | 2.6497   |
| 34 | 586.8507  | 100.6736 |
| 35 | 693.0692  | 25.4825  |
| 36 | 720.1232  | 10.0393  |
| 37 | 820.5524  | 0.0470   |
| 38 | 827.5733  | 17.5309  |
| 39 | 901.9050  | 61.8968  |
| 40 | 1117.3199 | 3.7223   |
| 41 | 1122.2588 | 120.5216 |

|    |           |           |
|----|-----------|-----------|
| 42 | 1151.8469 | 35.8358   |
| 43 | 1154.8053 | 157.2159  |
| 44 | 1156.0394 | 50.1848   |
| 45 | 1312.3290 | 386.4161  |
| 46 | 1390.2107 | 452.2395  |
| 47 | 1397.4157 | 45.8150   |
| 48 | 1504.5751 | 19.6270   |
| 49 | 1548.7811 | 67.4443   |
| 50 | 1602.2897 | 1.0559    |
| 51 | 1606.7340 | 28.1392   |
| 52 | 1616.5996 | 13.0712   |
| 53 | 1620.5088 | 16.6537   |
| 54 | 1636.5247 | 1.2533    |
| 55 | 1644.2518 | 19.4231   |
| 56 | 1650.7349 | 387.1313  |
| 57 | 1657.3615 | 0.5129    |
| 58 | 1658.7089 | 1.3807    |
| 59 | 1710.6879 | 140.3378  |
| 60 | 1723.7166 | 31.9045   |
| 61 | 1768.3242 | 318.5341  |
| 62 | 2652.6082 | 1409.2141 |
| 63 | 2831.9701 | 1765.0486 |
| 64 | 2844.7207 | 411.4019  |
| 65 | 3135.5273 | 32.2809   |
| 66 | 3139.0939 | 1007.6104 |
| 67 | 3183.1389 | 287.4657  |
| 68 | 3303.7766 | 244.1181  |
| 69 | 3313.3224 | 192.1774  |
| 70 | 3445.8568 | 0.1644    |
| 71 | 3446.0065 | 47.7355   |
| 72 | 3455.9327 | 61.6670   |
| 73 | 3455.9701 | 68.9136   |
| 74 | 3457.7934 | 58.1882   |
| 75 | 3509.1845 | 2.0788    |
| 76 | 3509.2572 | 5.9960    |
| 77 | 3513.5524 | 3.0207    |
| 78 | 3513.6136 | 7.5979    |

**Isomer V -d**

| # | Frequency | Infrared |
|---|-----------|----------|
| 1 | 14.1301   | 0.1301   |
| 2 | 26.8804   | 0.9326   |
| 3 | 32.2139   | 0.8548   |
| 4 | 46.6220   | 2.0844   |

|    |           |          |
|----|-----------|----------|
| 5  | 47.7448   | 1.8464   |
| 6  | 58.9571   | 1.7810   |
| 7  | 80.2921   | 6.3252   |
| 8  | 95.9169   | 10.4493  |
| 9  | 111.1772  | 3.9899   |
| 10 | 115.1632  | 14.3398  |
| 11 | 145.0841  | 7.8088   |
| 12 | 160.3696  | 8.0532   |
| 13 | 167.5580  | 4.3844   |
| 14 | 173.2391  | 0.7865   |
| 15 | 182.1920  | 0.7551   |
| 16 | 185.7867  | 18.8191  |
| 17 | 210.1160  | 2.9222   |
| 18 | 231.7595  | 35.3062  |
| 19 | 233.6698  | 7.9313   |
| 20 | 251.5510  | 15.3666  |
| 21 | 257.0999  | 16.9273  |
| 22 | 291.5633  | 37.3293  |
| 23 | 299.9507  | 35.4542  |
| 24 | 318.4575  | 131.8656 |
| 25 | 350.9456  | 20.7190  |
| 26 | 382.8005  | 37.6515  |
| 27 | 386.6063  | 97.1092  |
| 28 | 416.1728  | 26.4730  |
| 29 | 447.5181  | 132.7052 |
| 30 | 463.8575  | 54.8211  |
| 31 | 523.6025  | 78.2800  |
| 32 | 556.7385  | 29.6853  |
| 33 | 580.4629  | 0.4921   |
| 34 | 627.9742  | 11.5831  |
| 35 | 668.1514  | 1.9208   |
| 36 | 694.8686  | 19.9960  |
| 37 | 819.4911  | 1.0651   |
| 38 | 828.4672  | 20.6879  |
| 39 | 966.2166  | 57.6370  |
| 40 | 1090.8110 | 93.3650  |
| 41 | 1103.7807 | 108.6882 |
| 42 | 1109.4725 | 121.7904 |
| 43 | 1154.9697 | 100.1568 |
| 44 | 1161.8209 | 7.6080   |
| 45 | 1320.2033 | 181.6692 |
| 46 | 1402.4077 | 308.7171 |
| 47 | 1406.3606 | 318.1681 |
| 48 | 1510.0066 | 32.0315  |

|    |           |           |
|----|-----------|-----------|
| 49 | 1522.1248 | 98.0857   |
| 50 | 1606.1070 | 4.0612    |
| 51 | 1610.5413 | 14.6744   |
| 52 | 1613.9507 | 2.5192    |
| 53 | 1621.8207 | 8.6618    |
| 54 | 1633.2268 | 2.2771    |
| 55 | 1638.3262 | 7.1125    |
| 56 | 1641.8619 | 20.7537   |
| 57 | 1657.7543 | 6.6547    |
| 58 | 1663.5073 | 192.3334  |
| 59 | 1710.5017 | 36.9430   |
| 60 | 1724.2952 | 95.8011   |
| 61 | 1744.8991 | 709.0345  |
| 62 | 2740.7214 | 1297.4126 |
| 63 | 2862.3093 | 1046.2869 |
| 64 | 2988.5554 | 327.9328  |
| 65 | 3035.3309 | 629.5828  |
| 66 | 3156.2509 | 606.7991  |
| 67 | 3175.9851 | 522.4075  |
| 68 | 3333.1833 | 167.4977  |
| 69 | 3344.3989 | 124.4339  |
| 70 | 3355.2832 | 109.6761  |
| 71 | 3444.3766 | 25.4977   |
| 72 | 3467.3630 | 65.8289   |
| 73 | 3469.0064 | 47.6392   |
| 74 | 3479.2425 | 61.3364   |
| 75 | 3510.5107 | 3.4184    |
| 76 | 3511.1574 | 5.6672    |
| 77 | 3516.9058 | 5.1005    |
| 78 | 3521.3439 | 6.6215    |

**Isomer V -e**

| #  | Frequency | Infrared |
|----|-----------|----------|
| 1  | 19.1330   | 0.6260   |
| 2  | 23.2383   | 0.5129   |
| 3  | 26.9322   | 0.1444   |
| 4  | 30.6168   | 0.6765   |
| 5  | 53.9073   | 2.2763   |
| 6  | 58.9808   | 1.6599   |
| 7  | 68.8353   | 2.4651   |
| 8  | 107.8826  | 1.3497   |
| 9  | 112.1599  | 2.1128   |
| 10 | 137.2110  | 5.9105   |
| 11 | 145.9204  | 11.3835  |

|    |           |          |
|----|-----------|----------|
| 12 | 175.8409  | 8.9006   |
| 13 | 180.7703  | 11.5153  |
| 14 | 189.2544  | 23.0850  |
| 15 | 196.0808  | 11.7613  |
| 16 | 216.9639  | 3.8699   |
| 17 | 227.5566  | 10.1518  |
| 18 | 238.7712  | 30.3553  |
| 19 | 250.2554  | 77.7058  |
| 20 | 271.3403  | 78.5075  |
| 21 | 283.7988  | 18.9362  |
| 22 | 288.6437  | 19.6936  |
| 23 | 307.9585  | 54.5099  |
| 24 | 360.9832  | 57.8364  |
| 25 | 385.6054  | 27.8640  |
| 26 | 406.2897  | 66.4303  |
| 27 | 412.3263  | 9.3180   |
| 28 | 433.1120  | 56.0793  |
| 29 | 463.4047  | 37.0738  |
| 30 | 500.5989  | 43.6801  |
| 31 | 515.2146  | 14.8472  |
| 32 | 566.3962  | 9.8588   |
| 33 | 576.1044  | 35.1962  |
| 34 | 598.2767  | 58.9108  |
| 35 | 693.5706  | 31.5767  |
| 36 | 745.5721  | 10.2394  |
| 37 | 818.4718  | 0.3684   |
| 38 | 831.6689  | 21.7884  |
| 39 | 930.7740  | 59.4304  |
| 40 | 1103.0909 | 81.4062  |
| 41 | 1132.5048 | 62.5690  |
| 42 | 1156.2376 | 15.5552  |
| 43 | 1166.5602 | 107.0684 |
| 44 | 1171.3505 | 99.4073  |
| 45 | 1318.3930 | 308.7615 |
| 46 | 1395.6214 | 491.3640 |
| 47 | 1421.2899 | 24.9459  |
| 48 | 1486.2009 | 37.5857  |
| 49 | 1544.5439 | 48.1440  |
| 50 | 1602.5296 | 8.0399   |
| 51 | 1605.9729 | 6.6122   |
| 52 | 1618.5410 | 2.6849   |
| 53 | 1620.8712 | 8.2420   |
| 54 | 1640.7694 | 9.7687   |
| 55 | 1643.4102 | 11.7334  |

|    |           |           |
|----|-----------|-----------|
| 56 | 1657.2475 | 43.3576   |
| 57 | 1660.1640 | 336.1055  |
| 58 | 1661.0321 | 2.6351    |
| 59 | 1713.6711 | 17.8508   |
| 60 | 1726.7688 | 60.6521   |
| 61 | 1755.9548 | 521.4277  |
| 62 | 2567.6742 | 1718.4033 |
| 63 | 2766.8250 | 1653.2703 |
| 64 | 2818.6343 | 830.1709  |
| 65 | 3084.7843 | 222.8238  |
| 66 | 3093.0917 | 726.4808  |
| 67 | 3134.5715 | 522.4310  |
| 68 | 3276.3806 | 404.3666  |
| 69 | 3331.5571 | 187.6034  |
| 70 | 3441.8958 | 20.4494   |
| 71 | 3442.1583 | 24.0459   |
| 72 | 3452.5974 | 55.6811   |
| 73 | 3465.7883 | 65.6494   |
| 74 | 3483.7813 | 33.4823   |
| 75 | 3509.8654 | 2.5771    |
| 76 | 3509.9156 | 4.8184    |
| 77 | 3510.6305 | 5.1140    |
| 78 | 3513.9134 | 4.4584    |

**Isomer V -f**

| #  | Frequency | Infrared |
|----|-----------|----------|
| 1  | 28.4050   | 7.0983   |
| 2  | 37.0573   | 3.7225   |
| 3  | 44.5132   | 1.7507   |
| 4  | 60.6472   | 4.6665   |
| 5  | 61.1726   | 1.8399   |
| 6  | 67.3290   | 5.2207   |
| 7  | 85.8983   | 6.8453   |
| 8  | 101.2625  | 4.3000   |
| 9  | 122.5403  | 1.0220   |
| 10 | 151.7144  | 14.1809  |
| 11 | 169.4681  | 3.9868   |
| 12 | 176.1949  | 8.4416   |
| 13 | 182.8486  | 1.2552   |
| 14 | 185.0679  | 3.9262   |
| 15 | 200.4984  | 9.8467   |
| 16 | 230.7269  | 20.4819  |
| 17 | 239.3942  | 27.2610  |
| 18 | 250.0448  | 85.9991  |

|    |           |           |
|----|-----------|-----------|
| 19 | 268.3299  | 65.4809   |
| 20 | 282.2770  | 56.4122   |
| 21 | 289.9806  | 14.2701   |
| 22 | 302.6406  | 57.7578   |
| 23 | 325.4441  | 45.5585   |
| 24 | 334.5763  | 24.1692   |
| 25 | 348.7431  | 21.1788   |
| 26 | 370.1526  | 21.1123   |
| 27 | 401.6942  | 135.9513  |
| 28 | 425.3180  | 32.3794   |
| 29 | 472.6612  | 112.0159  |
| 30 | 508.6746  | 69.8614   |
| 31 | 534.9328  | 13.6722   |
| 32 | 552.2574  | 42.2612   |
| 33 | 603.5462  | 22.9787   |
| 34 | 712.0969  | 21.2519   |
| 35 | 721.7571  | 20.5037   |
| 36 | 738.9448  | 8.1870    |
| 37 | 822.4147  | 2.6908    |
| 38 | 845.0232  | 17.2458   |
| 39 | 1079.4581 | 190.0835  |
| 40 | 1103.3256 | 119.7423  |
| 41 | 1122.8373 | 104.7341  |
| 42 | 1155.8840 | 37.6713   |
| 43 | 1168.6279 | 77.4551   |
| 44 | 1235.0008 | 238.4739  |
| 45 | 1353.7216 | 45.9187   |
| 46 | 1373.4976 | 13.1009   |
| 47 | 1434.4813 | 519.7409  |
| 48 | 1456.9967 | 56.8294   |
| 49 | 1560.5323 | 156.7184  |
| 50 | 1583.4004 | 431.5494  |
| 51 | 1601.1554 | 23.4788   |
| 52 | 1605.2574 | 37.7609   |
| 53 | 1611.3019 | 24.7037   |
| 54 | 1614.0269 | 50.7355   |
| 55 | 1629.1728 | 4.6283    |
| 56 | 1636.3671 | 55.1977   |
| 57 | 1638.0085 | 14.9359   |
| 58 | 1662.2864 | 0.9083    |
| 59 | 1685.2183 | 359.3003  |
| 60 | 1701.0728 | 47.6777   |
| 61 | 1710.7688 | 26.4327   |
| 62 | 2477.9031 | 1730.2043 |



|    |           |           |
|----|-----------|-----------|
| 63 | 2519.2245 | 1773.0343 |
| 64 | 2616.9248 | 1573.1533 |
| 65 | 2923.1693 | 862.4357  |
| 66 | 3140.1282 | 446.4626  |
| 67 | 3294.0616 | 410.7794  |
| 68 | 3301.8815 | 99.3403   |
| 69 | 3320.8481 | 187.8252  |
| 70 | 3421.6203 | 38.0886   |
| 71 | 3456.2137 | 41.3472   |
| 72 | 3468.8043 | 54.3296   |
| 73 | 3476.9811 | 42.6705   |
| 74 | 3491.3996 | 29.4464   |
| 75 | 3509.5638 | 12.2248   |
| 76 | 3513.8465 | 3.1264    |
| 77 | 3521.3014 | 6.7873    |
| 78 | 3537.8347 | 11.2946   |

**Isomer V -g**

| #  | Frequency | Infrared |
|----|-----------|----------|
| 1  | 35.6228   | 0.8581   |
| 2  | 38.4779   | 2.2120   |
| 3  | 47.4792   | 0.6297   |
| 4  | 60.3498   | 0.2521   |
| 5  | 72.9561   | 1.0384   |
| 6  | 75.5762   | 4.6965   |
| 7  | 91.3260   | 3.2567   |
| 8  | 111.3114  | 1.5710   |
| 9  | 125.4439  | 0.6721   |
| 10 | 136.8277  | 14.8317  |
| 11 | 159.7590  | 8.3801   |
| 12 | 175.9180  | 6.5164   |
| 13 | 185.1640  | 5.1286   |
| 14 | 195.6684  | 30.6306  |
| 15 | 200.5169  | 20.8180  |
| 16 | 221.3164  | 3.8260   |
| 17 | 236.2526  | 21.8288  |
| 18 | 268.9763  | 19.9388  |
| 19 | 277.9401  | 51.9071  |
| 20 | 290.5816  | 38.3519  |
| 21 | 296.0409  | 35.2717  |
| 22 | 310.2317  | 24.0025  |
| 23 | 341.5010  | 49.4502  |
| 24 | 378.5301  | 51.8470  |
| 25 | 418.3608  | 24.4328  |

|    |           |           |
|----|-----------|-----------|
| 26 | 421.8619  | 25.6458   |
| 27 | 454.9731  | 74.5419   |
| 28 | 465.8450  | 42.8316   |
| 29 | 484.0401  | 72.1341   |
| 30 | 526.6377  | 97.4569   |
| 31 | 561.4053  | 29.6761   |
| 32 | 564.6809  | 4.4448    |
| 33 | 603.5738  | 28.4762   |
| 34 | 633.8197  | 9.1164    |
| 35 | 690.5092  | 22.0472   |
| 36 | 813.7988  | 0.4740    |
| 37 | 818.6154  | 28.0712   |
| 38 | 825.3767  | 1.1473    |
| 39 | 958.0035  | 57.5335   |
| 40 | 1111.4808 | 105.0260  |
| 41 | 1129.6125 | 25.3691   |
| 42 | 1138.9509 | 92.7554   |
| 43 | 1180.3106 | 106.6428  |
| 44 | 1227.1892 | 62.6487   |
| 45 | 1314.5706 | 114.8040  |
| 46 | 1390.3659 | 507.8871  |
| 47 | 1438.7520 | 16.4722   |
| 48 | 1472.6309 | 17.8815   |
| 49 | 1564.7458 | 56.2266   |
| 50 | 1587.2277 | 15.8827   |
| 51 | 1601.0604 | 7.9567    |
| 52 | 1607.8542 | 39.3910   |
| 53 | 1614.2532 | 11.0738   |
| 54 | 1631.8854 | 13.8260   |
| 55 | 1636.1441 | 23.2513   |
| 56 | 1644.4999 | 0.2863    |
| 57 | 1659.8464 | 37.8084   |
| 58 | 1665.5082 | 165.3832  |
| 59 | 1728.5186 | 7.0149    |
| 60 | 1732.9126 | 28.4340   |
| 61 | 1752.7165 | 294.6609  |
| 62 | 2334.6968 | 2008.4978 |
| 63 | 2470.2189 | 1309.3277 |
| 64 | 2829.5985 | 909.8472  |
| 65 | 3016.7724 | 359.5842  |
| 66 | 3162.2654 | 370.5624  |
| 67 | 3170.9387 | 498.6859  |
| 68 | 3263.6094 | 352.8536  |
| 69 | 3315.8316 | 150.3277  |

|    |           |         |
|----|-----------|---------|
| 70 | 3367.0928 | 98.8061 |
| 71 | 3449.0536 | 22.7172 |
| 72 | 3454.2404 | 34.1917 |
| 73 | 3460.8803 | 37.8424 |
| 74 | 3475.9799 | 25.4888 |
| 75 | 3489.7978 | 19.7683 |
| 76 | 3515.3106 | 2.9881  |
| 77 | 3515.6681 | 8.3412  |
| 78 | 3521.2940 | 6.5138  |

### **Isomer V -h**

| <b>#</b> | <b>Frequency</b> | <b>Infrared</b> |
|----------|------------------|-----------------|
| 1        | 9.5820           | 0.8726          |
| 2        | 13.1079          | 0.0994          |
| 3        | 30.5352          | 0.8433          |
| 4        | 36.9737          | 1.8934          |
| 5        | 45.3490          | 2.3036          |
| 6        | 58.9348          | 1.0443          |
| 7        | 65.5732          | 2.2030          |
| 8        | 90.7608          | 1.3859          |
| 9        | 116.3842         | 2.0823          |
| 10       | 131.9858         | 10.3750         |
| 11       | 149.3121         | 15.7292         |
| 12       | 162.7285         | 0.1048          |
| 13       | 176.8291         | 22.3220         |
| 14       | 185.3712         | 20.0213         |
| 15       | 199.3575         | 22.9400         |
| 16       | 218.2562         | 11.1413         |
| 17       | 227.2503         | 24.9557         |
| 18       | 237.9772         | 17.7434         |
| 19       | 253.6702         | 28.3280         |
| 20       | 272.8226         | 19.3867         |
| 21       | 281.6774         | 77.4109         |
| 22       | 304.3516         | 35.7053         |
| 23       | 311.5037         | 83.1352         |
| 24       | 337.1819         | 4.2789          |
| 25       | 378.5320         | 27.7822         |
| 26       | 421.4970         | 17.6074         |
| 27       | 429.6038         | 69.6243         |
| 28       | 442.8394         | 77.2086         |
| 29       | 464.9254         | 60.5501         |
| 30       | 489.0356         | 31.2112         |
| 31       | 518.3064         | 10.2827         |
| 32       | 545.3716         | 32.8308         |

|    |           |           |
|----|-----------|-----------|
| 33 | 564.3812  | 8.0021    |
| 34 | 607.2650  | 51.9335   |
| 35 | 694.3104  | 31.4347   |
| 36 | 747.5074  | 6.3920    |
| 37 | 817.4867  | 0.0064    |
| 38 | 834.4742  | 30.2003   |
| 39 | 925.3487  | 60.3921   |
| 40 | 1096.3498 | 132.0126  |
| 41 | 1134.7615 | 56.9346   |
| 42 | 1157.1424 | 11.9140   |
| 43 | 1160.7195 | 73.9550   |
| 44 | 1199.5190 | 93.0708   |
| 45 | 1320.3517 | 342.3231  |
| 46 | 1397.0104 | 483.8948  |
| 47 | 1434.3478 | 28.5580   |
| 48 | 1481.3572 | 36.0040   |
| 49 | 1543.0016 | 30.3786   |
| 50 | 1603.8180 | 9.3007    |
| 51 | 1607.3895 | 4.4331    |
| 52 | 1609.7539 | 34.9654   |
| 53 | 1619.2233 | 9.2949    |
| 54 | 1635.9830 | 12.1399   |
| 55 | 1644.1442 | 84.2009   |
| 56 | 1652.8806 | 168.1573  |
| 57 | 1659.6626 | 116.7753  |
| 58 | 1668.6509 | 3.9636    |
| 59 | 1720.3580 | 4.8430    |
| 60 | 1721.9441 | 25.7432   |
| 61 | 1759.8920 | 497.2706  |
| 62 | 2502.2007 | 2000.1359 |
| 63 | 2686.5715 | 1502.8731 |
| 64 | 2904.0336 | 937.7639  |
| 65 | 3030.3046 | 799.1310  |
| 66 | 3107.6957 | 345.3457  |
| 67 | 3121.6089 | 564.1530  |
| 68 | 3279.9659 | 343.9759  |
| 69 | 3350.3695 | 132.4997  |
| 70 | 3432.6718 | 16.3558   |
| 71 | 3436.4132 | 21.6656   |
| 72 | 3449.4044 | 53.0871   |
| 73 | 3478.1316 | 28.2807   |
| 74 | 3478.2556 | 69.3845   |
| 75 | 3502.4743 | 3.8933    |
| 76 | 3504.2314 | 2.0313    |

|    |           |        |
|----|-----------|--------|
| 77 | 3506.7556 | 3.0235 |
| 78 | 3522.2757 | 7.5895 |

**Isomer V -i**

| #  | Frequency | Infrared |
|----|-----------|----------|
| 1  | 23.9076   | 3.2753   |
| 2  | 30.1068   | 3.4859   |
| 3  | 33.2462   | 0.6506   |
| 4  | 47.1485   | 6.1139   |
| 5  | 55.4351   | 1.5343   |
| 6  | 71.2418   | 1.7924   |
| 7  | 87.3495   | 1.0902   |
| 8  | 103.8466  | 4.1014   |
| 9  | 132.5719  | 18.2557  |
| 10 | 144.7437  | 9.3987   |
| 11 | 177.8563  | 4.2420   |
| 12 | 189.0614  | 16.0152  |
| 13 | 190.3042  | 5.7643   |
| 14 | 193.7685  | 0.7196   |
| 15 | 200.1729  | 4.6089   |
| 16 | 216.7358  | 0.8031   |
| 17 | 237.7830  | 46.5428  |
| 18 | 246.4351  | 56.8011  |
| 19 | 251.9402  | 43.4439  |
| 20 | 281.3717  | 64.8818  |
| 21 | 290.6429  | 10.5408  |
| 22 | 312.1138  | 5.2835   |
| 23 | 327.7262  | 116.6254 |
| 24 | 333.7898  | 15.2254  |
| 25 | 347.5498  | 18.3888  |
| 26 | 382.2922  | 17.8860  |
| 27 | 404.2601  | 209.3968 |
| 28 | 422.4430  | 51.2799  |
| 29 | 426.8781  | 23.6999  |
| 30 | 513.2486  | 13.8583  |
| 31 | 518.1830  | 119.3643 |
| 32 | 568.6439  | 27.7878  |
| 33 | 605.5021  | 44.2634  |
| 34 | 688.1763  | 14.1821  |
| 35 | 731.9737  | 29.0618  |
| 36 | 749.5306  | 4.4245   |

**Isomer V -j**

| # | Frequency | Infrared |
|---|-----------|----------|
|---|-----------|----------|

|    |          |          |
|----|----------|----------|
| 1  | 13.9999  | 0.6363   |
| 2  | 19.0903  | 2.1928   |
| 3  | 21.5026  | 4.9858   |
| 4  | 32.2054  | 0.5795   |
| 5  | 34.7650  | 0.8692   |
| 6  | 47.6016  | 1.3410   |
| 7  | 71.4195  | 14.7573  |
| 8  | 78.0553  | 7.9050   |
| 9  | 89.2892  | 17.2640  |
| 10 | 98.7930  | 0.9661   |
| 11 | 127.5890 | 17.3207  |
| 12 | 150.3187 | 6.8242   |
| 13 | 166.1178 | 0.2402   |
| 14 | 183.3837 | 5.2432   |
| 15 | 186.6611 | 4.8090   |
| 16 | 187.8273 | 29.0877  |
| 17 | 203.9368 | 3.2317   |
| 18 | 222.1233 | 20.2931  |
| 19 | 241.0199 | 6.2729   |
| 20 | 258.5872 | 90.8506  |
| 21 | 272.3892 | 201.4771 |
| 22 | 298.1250 | 4.1734   |
| 23 | 313.1248 | 75.1758  |
| 24 | 318.3613 | 33.6556  |
| 25 | 338.4129 | 12.6618  |
| 26 | 360.3566 | 41.0205  |
| 27 | 383.9157 | 67.5314  |
| 28 | 387.8846 | 40.9890  |
| 29 | 422.2528 | 57.0062  |
| 30 | 432.0559 | 223.1795 |
| 31 | 495.5065 | 51.6043  |
| 32 | 520.5558 | 2.3918   |
| 33 | 611.1214 | 63.5517  |
| 34 | 628.1034 | 8.8017   |
| 35 | 651.2765 | 7.9269   |
| 36 | 741.8806 | 34.4503  |

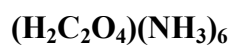

**Isomers VI -a**

| # | Frequency | Infrared |
|---|-----------|----------|
| 1 | 4.0306    | 0.6446   |
| 2 | 18.5390   | 0.0097   |
| 3 | 23.3089   | 0.5762   |
| 4 | 27.5060   | 0.0010   |

|    |           |          |
|----|-----------|----------|
| 5  | 41.9668   | 1.5766   |
| 6  | 47.0029   | 2.4447   |
| 7  | 63.5252   | 1.1029   |
| 8  | 69.9650   | 3.9925   |
| 9  | 73.5132   | 0.6051   |
| 10 | 103.7064  | 5.1082   |
| 11 | 124.6088  | 9.9387   |
| 12 | 135.6940  | 14.4016  |
| 13 | 161.3958  | 2.8590   |
| 14 | 165.1257  | 0.0526   |
| 15 | 166.2532  | 12.5778  |
| 16 | 176.5581  | 10.9683  |
| 17 | 188.1050  | 0.9184   |
| 18 | 188.9118  | 7.6087   |
| 19 | 192.3462  | 26.5911  |
| 20 | 212.1206  | 0.7457   |
| 21 | 217.5356  | 30.1385  |
| 22 | 235.6980  | 18.4961  |
| 23 | 236.2106  | 16.0280  |
| 24 | 245.3021  | 6.7954   |
| 25 | 248.1716  | 58.5278  |
| 26 | 295.2030  | 33.6416  |
| 27 | 298.8394  | 4.7444   |
| 28 | 311.3165  | 57.1772  |
| 29 | 365.9519  | 76.1689  |
| 30 | 385.8296  | 1.6959   |
| 31 | 388.4246  | 19.5912  |
| 32 | 391.4139  | 52.0521  |
| 33 | 414.9568  | 114.5348 |
| 34 | 420.4567  | 35.8986  |
| 35 | 465.4447  | 46.8869  |
| 36 | 529.0680  | 24.7634  |
| 37 | 550.8076  | 141.2987 |
| 38 | 562.9473  | 44.3971  |
| 39 | 647.0066  | 9.9040   |
| 40 | 673.1222  | 2.2276   |
| 41 | 675.0966  | 2.0592   |
| 42 | 692.0722  | 17.3623  |
| 43 | 820.0663  | 0.1609   |
| 44 | 829.3865  | 21.0192  |
| 45 | 912.4760  | 59.9807  |
| 46 | 1093.8123 | 136.3339 |
| 47 | 1114.8534 | 13.8386  |
| 48 | 1122.1581 | 105.8176 |

|    |           |           |
|----|-----------|-----------|
| 49 | 1151.5475 | 135.0256  |
| 50 | 1152.6458 | 69.8119   |
| 51 | 1154.3944 | 24.2998   |
| 52 | 1320.4779 | 335.5075  |
| 53 | 1393.5293 | 453.6792  |
| 54 | 1465.3652 | 34.9478   |
| 55 | 1508.5570 | 19.8346   |
| 56 | 1520.7054 | 44.0924   |
| 57 | 1601.9819 | 1.0363    |
| 58 | 1606.0570 | 18.7205   |
| 59 | 1610.1773 | 15.8837   |
| 60 | 1616.2736 | 14.9279   |
| 61 | 1621.6669 | 13.2824   |
| 62 | 1636.2119 | 1.1733    |
| 63 | 1638.3062 | 9.7718    |
| 64 | 1647.5430 | 29.5460   |
| 65 | 1652.8552 | 308.1594  |
| 66 | 1657.4664 | 1.6487    |
| 67 | 1659.5758 | 10.9432   |
| 68 | 1731.8442 | 49.6404   |
| 69 | 1740.7228 | 20.4497   |
| 70 | 1769.8757 | 459.6435  |
| 71 | 2888.2469 | 946.7082  |
| 72 | 2895.0799 | 1412.8560 |
| 73 | 2922.0211 | 536.9021  |
| 74 | 2994.0637 | 1000.2513 |
| 75 | 3136.9434 | 57.6206   |
| 76 | 3139.3041 | 392.9357  |
| 77 | 3143.8006 | 968.9346  |
| 78 | 3286.8999 | 251.6429  |
| 79 | 3299.7468 | 258.9408  |
| 80 | 3360.6426 | 145.9147  |
| 81 | 3444.5159 | 2.9372    |
| 82 | 3444.7279 | 43.1547   |
| 83 | 3453.2305 | 52.2105   |
| 84 | 3455.1792 | 48.6212   |
| 85 | 3482.3041 | 82.2081   |
| 86 | 3508.9474 | 2.1635    |
| 87 | 3509.0717 | 4.3846    |
| 88 | 3512.1923 | 2.6800    |
| 89 | 3512.2721 | 5.2884    |
| 90 | 3522.2666 | 5.8675    |



**Isomers VI -b**

| <b>#</b> | <b>Frequency</b> | <b>Infrared</b> |
|----------|------------------|-----------------|
| 1        | 18.1828          | 0.8817          |
| 2        | 24.1947          | 0.1908          |
| 3        | 30.8313          | 0.5862          |
| 4        | 34.7125          | 0.0492          |
| 5        | 43.8050          | 1.6164          |
| 6        | 51.9201          | 2.2940          |
| 7        | 59.5582          | 0.6803          |
| 8        | 64.1232          | 3.2599          |
| 9        | 79.4149          | 1.2855          |
| 10       | 112.4337         | 3.7431          |
| 11       | 125.1381         | 6.3515          |
| 12       | 137.1785         | 12.3436         |
| 13       | 166.8533         | 2.5607          |
| 14       | 171.8250         | 12.6426         |
| 15       | 178.5578         | 4.4688          |
| 16       | 183.0947         | 24.0004         |
| 17       | 185.5039         | 16.0232         |
| 18       | 195.2854         | 16.8672         |
| 19       | 198.8834         | 12.8388         |
| 20       | 202.4101         | 2.6138          |
| 21       | 216.8331         | 4.9453          |
| 22       | 234.8162         | 21.2954         |
| 23       | 247.4881         | 30.6986         |
| 24       | 257.6337         | 29.1539         |
| 25       | 272.5741         | 14.0230         |
| 26       | 288.5092         | 34.6868         |
| 27       | 294.7274         | 28.0188         |
| 28       | 315.0247         | 50.3807         |
| 29       | 372.7320         | 49.1249         |
| 30       | 378.5988         | 60.8188         |
| 31       | 389.7693         | 48.5619         |
| 32       | 414.9619         | 28.2809         |
| 33       | 419.0473         | 19.8285         |
| 34       | 436.9385         | 90.7168         |
| 35       | 464.2576         | 60.7309         |
| 36       | 520.9795         | 45.7368         |
| 37       | 561.8794         | 120.3750        |
| 38       | 567.2967         | 23.5583         |
| 39       | 617.3727         | 6.3905          |
| 40       | 640.0447         | 3.9822          |
| 41       | 694.8948         | 20.2249         |

|    |           |           |
|----|-----------|-----------|
| 42 | 699.4077  | 0.0907    |
| 43 | 819.6670  | 14.9560   |
| 44 | 822.7036  | 10.4274   |
| 45 | 982.0796  | 56.2567   |
| 46 | 1100.6828 | 96.4888   |
| 47 | 1110.6423 | 71.1437   |
| 48 | 1121.1428 | 88.0238   |
| 49 | 1151.9326 | 115.3799  |
| 50 | 1167.7849 | 3.6889    |
| 51 | 1170.5014 | 94.1271   |
| 52 | 1315.4753 | 157.1602  |
| 53 | 1405.3778 | 619.2026  |
| 54 | 1480.2970 | 28.6479   |
| 55 | 1497.7124 | 25.3455   |
| 56 | 1502.0979 | 64.1046   |
| 57 | 1603.3284 | 6.4182    |
| 58 | 1605.9567 | 5.5049    |
| 59 | 1606.8851 | 5.8898    |
| 60 | 1620.1038 | 5.4540    |
| 61 | 1621.0275 | 5.7941    |
| 62 | 1637.6369 | 3.5898    |
| 63 | 1640.2207 | 13.1869   |
| 64 | 1650.5494 | 15.9189   |
| 65 | 1658.2897 | 0.9650    |
| 66 | 1660.4817 | 7.7445    |
| 67 | 1667.5901 | 129.9026  |
| 68 | 1730.3965 | 183.8745  |
| 69 | 1736.3811 | 77.6061   |
| 70 | 1737.1661 | 554.4356  |
| 71 | 2814.6590 | 1300.7971 |
| 72 | 2914.8558 | 1024.2093 |
| 73 | 2947.8768 | 253.0558  |
| 74 | 2967.2195 | 1008.5919 |
| 75 | 3098.7253 | 226.7544  |
| 76 | 3112.9022 | 744.4641  |
| 77 | 3153.4183 | 692.2970  |
| 78 | 3264.8155 | 349.0902  |
| 79 | 3294.6628 | 301.6347  |
| 80 | 3335.1578 | 214.1550  |
| 81 | 3440.0324 | 20.3813   |
| 82 | 3444.8104 | 25.1988   |
| 83 | 3451.2912 | 45.2458   |
| 84 | 3464.5643 | 39.2882   |
| 85 | 3465.4966 | 90.0625   |

|    |           |        |
|----|-----------|--------|
| 86 | 3508.3915 | 3.1719 |
| 87 | 3509.4927 | 3.4887 |
| 88 | 3511.7505 | 3.2778 |
| 89 | 3512.4811 | 4.8274 |
| 90 | 3521.5917 | 5.0499 |

**Isomers VI -c**

| #  | Frequency | Infrared |
|----|-----------|----------|
| 1  | 28.0191   | 1.1305   |
| 2  | 34.5468   | 0.5368   |
| 3  | 42.5571   | 0.4960   |
| 4  | 54.8314   | 3.0460   |
| 5  | 57.9475   | 1.7833   |
| 6  | 67.1326   | 1.5319   |
| 7  | 72.2952   | 3.2245   |
| 8  | 77.9374   | 1.7963   |
| 9  | 97.2401   | 0.4546   |
| 10 | 110.6251  | 1.2740   |
| 11 | 116.6220  | 0.4805   |
| 12 | 138.9816  | 11.8383  |
| 13 | 149.9827  | 17.0179  |
| 14 | 173.7257  | 1.1564   |
| 15 | 176.1361  | 30.0584  |
| 16 | 188.3049  | 7.5908   |
| 17 | 190.2520  | 30.7361  |
| 18 | 197.9524  | 9.2860   |
| 19 | 214.2980  | 6.1055   |
| 20 | 229.1734  | 25.6267  |
| 21 | 256.6250  | 30.4731  |
| 22 | 264.7527  | 6.3398   |
| 23 | 268.7709  | 48.1709  |
| 24 | 272.3921  | 5.9963   |
| 25 | 287.6863  | 92.5883  |
| 26 | 297.5925  | 32.5290  |
| 27 | 311.5554  | 18.4250  |
| 28 | 362.8264  | 7.3274   |
| 29 | 394.7477  | 34.6422  |
| 30 | 418.1533  | 43.5434  |
| 31 | 423.8570  | 31.6955  |
| 32 | 451.7040  | 76.4790  |
| 33 | 470.8511  | 75.7588  |
| 34 | 478.7582  | 80.0887  |
| 35 | 527.5217  | 117.1272 |
| 36 | 533.4347  | 15.1315  |

|    |           |           |
|----|-----------|-----------|
| 37 | 563.1213  | 8.6996    |
| 38 | 566.9205  | 11.6271   |
| 39 | 604.3507  | 24.3484   |
| 40 | 628.0035  | 12.1798   |
| 41 | 689.6059  | 20.4206   |
| 42 | 817.3966  | 27.0245   |
| 43 | 823.2677  | 1.8234    |
| 44 | 825.3046  | 0.7909    |
| 45 | 969.4252  | 57.3303   |
| 46 | 1096.5654 | 106.8662  |
| 47 | 1105.6945 | 105.2779  |
| 48 | 1122.8384 | 15.2566   |
| 49 | 1170.7158 | 117.2773  |
| 50 | 1194.6393 | 83.4353   |
| 51 | 1215.8049 | 68.7239   |
| 52 | 1313.2316 | 114.3998  |
| 53 | 1393.1392 | 494.7048  |
| 54 | 1448.3108 | 10.9571   |
| 55 | 1470.0711 | 18.5684   |
| 56 | 1566.1033 | 54.9134   |
| 57 | 1587.4103 | 13.2069   |
| 58 | 1600.8934 | 7.2467    |
| 59 | 1605.7543 | 3.1468    |
| 60 | 1611.0134 | 33.1194   |
| 61 | 1612.0726 | 9.7360    |
| 62 | 1633.1284 | 16.5951   |
| 63 | 1641.4604 | 7.2264    |
| 64 | 1645.9879 | 1.2987    |
| 65 | 1655.4736 | 8.1851    |
| 66 | 1661.9041 | 41.6533   |
| 67 | 1668.5988 | 178.3417  |
| 68 | 1732.2523 | 8.2506    |
| 69 | 1733.1679 | 3.9805    |
| 70 | 1758.8619 | 332.1104  |
| 71 | 2351.6036 | 2001.1553 |
| 72 | 2572.9181 | 1533.6619 |
| 73 | 2665.0615 | 871.4951  |
| 74 | 2977.7516 | 402.9293  |
| 75 | 3164.0924 | 374.1541  |
| 76 | 3191.5110 | 330.0129  |
| 77 | 3204.9602 | 398.2950  |
| 78 | 3267.9874 | 359.6415  |
| 79 | 3316.0274 | 231.1099  |
| 80 | 3339.7970 | 162.8975  |

|    |           |         |
|----|-----------|---------|
| 81 | 3423.7046 | 28.2614 |
| 82 | 3450.3931 | 22.4997 |
| 83 | 3455.8531 | 39.8967 |
| 84 | 3464.3341 | 51.8592 |
| 85 | 3474.5727 | 23.7377 |
| 86 | 3490.2951 | 18.7181 |
| 87 | 3499.5914 | 13.2019 |
| 88 | 3515.6697 | 2.6908  |
| 89 | 3516.7878 | 3.6558  |
| 90 | 3520.8291 | 6.9880  |

### **Isomers VI -d**

| <b>#</b> | <b>Frequency</b> | <b>Infrared</b> |
|----------|------------------|-----------------|
| 1        | 23.5144          | 0.9690          |
| 2        | 33.0035          | 1.7985          |
| 3        | 36.9028          | 0.8198          |
| 4        | 42.9092          | 0.6278          |
| 5        | 55.3341          | 1.0242          |
| 6        | 60.8083          | 3.2474          |
| 7        | 67.1104          | 1.5790          |
| 8        | 81.8014          | 1.4258          |
| 9        | 98.8261          | 1.2057          |
| 10       | 100.0231         | 1.1172          |
| 11       | 141.1209         | 3.5589          |
| 12       | 148.1158         | 4.6345          |
| 13       | 160.4885         | 10.3180         |
| 14       | 167.2630         | 16.6289         |
| 15       | 168.9817         | 2.7384          |
| 16       | 184.3420         | 18.1749         |
| 17       | 187.8428         | 36.6991         |
| 18       | 194.7001         | 8.2414          |
| 19       | 202.7345         | 21.0655         |
| 20       | 226.4063         | 4.2713          |
| 21       | 235.4758         | 22.8063         |
| 22       | 252.8572         | 9.8158          |
| 23       | 275.1463         | 38.3894         |
| 24       | 285.0227         | 39.9148         |
| 25       | 300.3105         | 4.5649          |
| 26       | 308.0735         | 49.8079         |
| 27       | 325.5218         | 70.0616         |
| 28       | 342.7033         | 40.8732         |
| 29       | 375.0985         | 57.9188         |
| 30       | 413.5916         | 32.8451         |
| 31       | 417.5336         | 27.0830         |

|    |           |           |
|----|-----------|-----------|
| 32 | 447.9826  | 60.7818   |
| 33 | 457.6776  | 71.1426   |
| 34 | 468.7280  | 18.6176   |
| 35 | 479.1943  | 30.2856   |
| 36 | 522.9314  | 99.6242   |
| 37 | 563.0096  | 8.3046    |
| 38 | 581.5938  | 36.5280   |
| 39 | 629.7431  | 15.9964   |
| 40 | 664.3049  | 21.2864   |
| 41 | 689.8002  | 22.2691   |
| 42 | 820.2231  | 24.5473   |
| 43 | 822.8274  | 1.4056    |
| 44 | 825.6221  | 1.8843    |
| 45 | 947.0766  | 65.9531   |
| 46 | 1106.0275 | 75.1776   |
| 47 | 1114.7035 | 104.2201  |
| 48 | 1123.8555 | 73.1270   |
| 49 | 1140.9891 | 35.5158   |
| 50 | 1182.0850 | 91.7362   |
| 51 | 1249.4056 | 45.8925   |
| 52 | 1315.8837 | 119.8197  |
| 53 | 1388.4896 | 523.0257  |
| 54 | 1437.0420 | 6.0922    |
| 55 | 1476.7217 | 18.2409   |
| 56 | 1565.4827 | 47.1018   |
| 57 | 1594.0635 | 19.4296   |
| 58 | 1604.0107 | 5.1473    |
| 59 | 1609.9977 | 4.9548    |
| 60 | 1614.7276 | 19.2268   |
| 61 | 1625.2483 | 11.8353   |
| 62 | 1634.8542 | 15.2248   |
| 63 | 1638.0445 | 19.5146   |
| 64 | 1639.4481 | 7.4260    |
| 65 | 1649.1173 | 7.0776    |
| 66 | 1666.4659 | 252.2123  |
| 67 | 1670.2782 | 13.6131   |
| 68 | 1727.3068 | 0.9997    |
| 69 | 1734.9241 | 40.9616   |
| 70 | 1752.9460 | 356.5793  |
| 71 | 2157.0624 | 2415.1204 |
| 72 | 2521.4269 | 1331.3554 |
| 73 | 2875.6209 | 852.9484  |
| 74 | 3049.9250 | 327.8387  |
| 75 | 3149.3800 | 321.6249  |

|    |           |          |
|----|-----------|----------|
| 76 | 3171.4936 | 618.1605 |
| 77 | 3211.6128 | 298.7068 |
| 78 | 3261.9512 | 444.5209 |
| 79 | 3306.6152 | 141.7272 |
| 80 | 3310.7443 | 257.2301 |
| 81 | 3448.9029 | 24.8341  |
| 82 | 3451.9691 | 32.6688  |
| 83 | 3458.0340 | 38.6734  |
| 84 | 3460.9922 | 54.2927  |
| 85 | 3472.2714 | 11.3452  |
| 86 | 3474.3898 | 24.3033  |
| 87 | 3511.5911 | 2.5835   |
| 88 | 3512.2233 | 2.3488   |
| 89 | 3515.2706 | 6.8116   |
| 90 | 3521.0563 | 5.5358   |

### Isomers VI -e

| #  | Frequency | Infrared |
|----|-----------|----------|
| 1  | 19.5971   | 0.3950   |
| 2  | 26.6857   | 0.8465   |
| 3  | 28.0908   | 4.3646   |
| 4  | 36.9544   | 2.0429   |
| 5  | 46.8914   | 5.0405   |
| 6  | 49.7306   | 0.6369   |
| 7  | 57.2897   | 1.1316   |
| 8  | 82.5863   | 1.2692   |
| 9  | 88.2458   | 0.4639   |
| 10 | 105.7249  | 3.6336   |
| 11 | 125.0667  | 8.5471   |
| 12 | 150.1894  | 12.4496  |
| 13 | 171.3543  | 0.3780   |
| 14 | 178.5172  | 3.7773   |
| 15 | 188.6413  | 12.2712  |
| 16 | 194.3400  | 11.3285  |
| 17 | 207.1378  | 1.1812   |
| 18 | 212.0872  | 11.6144  |
| 19 | 219.3106  | 16.4860  |
| 20 | 235.3127  | 19.6284  |
| 21 | 243.3332  | 31.2321  |
| 22 | 254.5446  | 17.5972  |
| 23 | 261.4941  | 111.8491 |
| 24 | 277.3320  | 87.3427  |
| 25 | 290.1268  | 39.2252  |
| 26 | 310.4121  | 2.2628   |

|    |          |         |
|----|----------|---------|
| 27 | 316.0171 | 55.1032 |
| 28 | 334.1031 | 14.8179 |
| 29 | 346.0727 | 19.0018 |
| 30 | 347.6992 | 16.8599 |
| 31 | 386.5532 | 42.1132 |
| 32 | 419.3796 | 51.0143 |
| 33 | 431.1429 | 69.9281 |
| 34 | 459.6791 | 92.3794 |
| 35 | 503.3245 | 7.8163  |

**Isomers VI -f**

| #  | Frequency | Infrared |
|----|-----------|----------|
| 1  | 20.8757   | 0.9237   |
| 2  | 24.9667   | 1.9605   |
| 3  | 27.5535   | 0.3635   |
| 4  | 30.8299   | 0.3615   |
| 5  | 45.3827   | 1.8756   |
| 6  | 54.7078   | 2.6643   |
| 7  | 64.0687   | 3.7250   |
| 8  | 72.0580   | 0.2903   |
| 9  | 84.8859   | 3.6166   |
| 10 | 101.4199  | 1.0065   |
| 11 | 128.9562  | 10.0796  |
| 12 | 141.8262  | 8.3535   |
| 13 | 153.7890  | 3.9055   |
| 14 | 165.9081  | 17.5782  |
| 15 | 172.4763  | 34.0838  |
| 16 | 178.2612  | 33.2532  |
| 17 | 184.6134  | 19.6601  |
| 18 | 195.8762  | 5.1747   |
| 19 | 203.3642  | 8.0279   |
| 20 | 219.9913  | 1.8265   |
| 21 | 240.4439  | 31.8202  |
| 22 | 253.0788  | 0.9863   |
| 23 | 269.2693  | 38.0509  |
| 24 | 300.3673  | 39.9047  |
| 25 | 310.3366  | 12.4050  |
| 26 | 326.0110  | 38.8788  |
| 27 | 342.6489  | 60.0166  |
| 28 | 360.1772  | 11.0979  |
| 29 | 370.1502  | 74.7795  |
| 30 | 403.5127  | 44.5429  |
| 31 | 416.7528  | 35.1118  |
| 32 | 444.6279  | 39.0518  |



|    |           |           |
|----|-----------|-----------|
| 33 | 453.1044  | 30.7771   |
| 34 | 469.3237  | 79.0252   |
| 35 | 511.0079  | 9.4967    |
| 36 | 530.3116  | 46.1758   |
| 37 | 558.6472  | 99.4352   |
| 38 | 561.9986  | 13.3813   |
| 39 | 599.9056  | 28.1764   |
| 40 | 673.0874  | 24.5448   |
| 41 | 689.1154  | 22.3910   |
| 42 | 817.5254  | 1.7053    |
| 43 | 820.8085  | 28.7665   |
| 44 | 821.8540  | 3.4796    |
| 45 | 944.5742  | 56.3899   |
| 46 | 1126.9134 | 127.7877  |
| 47 | 1129.1768 | 68.4750   |
| 48 | 1139.8847 | 68.7362   |
| 49 | 1152.2057 | 18.7364   |
| 50 | 1173.7565 | 76.3530   |
| 51 | 1225.8307 | 42.7489   |
| 52 | 1319.1657 | 213.0344  |
| 53 | 1395.9777 | 567.7777  |
| 54 | 1399.4554 | 3.5868    |
| 55 | 1472.8579 | 21.7284   |
| 56 | 1567.7574 | 72.1641   |
| 57 | 1596.5845 | 23.1666   |
| 58 | 1604.4209 | 7.4684    |
| 59 | 1608.5174 | 8.6838    |
| 60 | 1615.1309 | 8.1310    |
| 61 | 1628.1691 | 40.9256   |
| 62 | 1636.9069 | 1.2872    |
| 63 | 1641.0863 | 9.8372    |
| 64 | 1643.8281 | 20.8857   |
| 65 | 1659.6235 | 137.4182  |
| 66 | 1661.3424 | 5.8403    |
| 67 | 1668.2470 | 115.4060  |
| 68 | 1720.2292 | 10.0801   |
| 69 | 1730.2791 | 30.4002   |
| 70 | 1752.1699 | 514.1051  |
| 71 | 2200.6911 | 2147.5972 |
| 72 | 2571.4693 | 1375.9987 |
| 73 | 2852.4359 | 951.5118  |
| 74 | 3053.6921 | 314.6971  |
| 75 | 3140.6860 | 316.3295  |
| 76 | 3170.0098 | 554.8263  |

|    |           |          |
|----|-----------|----------|
| 77 | 3180.6860 | 545.5093 |
| 78 | 3267.7607 | 310.0791 |
| 79 | 3309.9387 | 198.0794 |
| 80 | 3319.1116 | 392.3574 |
| 81 | 3443.0260 | 23.1672  |
| 82 | 3446.7697 | 51.7010  |
| 83 | 3450.2587 | 22.5493  |
| 84 | 3462.3845 | 61.4494  |
| 85 | 3484.0269 | 19.1973  |
| 86 | 3485.2480 | 27.0877  |
| 87 | 3505.4432 | 2.6552   |
| 88 | 3510.1428 | 1.9108   |
| 89 | 3515.7410 | 6.7159   |
| 90 | 3521.0462 | 5.8638   |

### **Isomers VI -g**

| #  | Frequency | Infrared |
|----|-----------|----------|
| 1  | 17.2922   | 1.3316   |
| 2  | 19.1564   | 0.5646   |
| 3  | 22.5516   | 1.6670   |
| 4  | 31.0566   | 2.6238   |
| 5  | 38.1231   | 3.1362   |
| 6  | 48.9373   | 3.7829   |
| 7  | 67.4575   | 0.4574   |
| 8  | 79.1572   | 3.0004   |
| 9  | 92.6517   | 3.5368   |
| 10 | 101.1293  | 8.8093   |
| 11 | 113.2293  | 22.4177  |
| 12 | 136.5999  | 5.5681   |
| 13 | 138.4785  | 13.4362  |
| 14 | 170.6211  | 21.2432  |
| 15 | 180.2264  | 42.6659  |
| 16 | 186.8146  | 8.5292   |
| 17 | 191.8005  | 27.7215  |
| 18 | 201.0414  | 6.4162   |
| 19 | 211.7205  | 18.4759  |
| 20 | 231.7619  | 29.9257  |
| 21 | 238.0072  | 12.7251  |
| 22 | 248.7103  | 59.3446  |
| 23 | 256.8541  | 17.7561  |
| 24 | 272.0847  | 43.1846  |
| 25 | 274.2720  | 52.6367  |
| 26 | 296.8180  | 102.6697 |
| 27 | 306.1470  | 33.3808  |

|    |           |           |
|----|-----------|-----------|
| 28 | 326.5678  | 28.2942   |
| 29 | 351.1632  | 11.4399   |
| 30 | 373.2466  | 44.3123   |
| 31 | 410.4394  | 23.0842   |
| 32 | 428.6299  | 89.1865   |
| 33 | 445.1405  | 24.3604   |
| 34 | 452.3394  | 190.1928  |
| 35 | 471.8245  | 33.0345   |
| 36 | 492.7185  | 28.7595   |
| 37 | 565.5634  | 46.8225   |
| 38 | 570.7719  | 23.1965   |
| 39 | 577.3092  | 18.4013   |
| 40 | 659.7229  | 19.5676   |
| 41 | 671.7576  | 36.5931   |
| 42 | 726.2252  | 37.1824   |
| 43 | 823.9745  | 0.5483    |
| 44 | 845.0053  | 28.1297   |
| 45 | 1079.3486 | 108.3876  |
| 46 | 1104.1589 | 117.8874  |
| 47 | 1129.7078 | 74.4087   |
| 48 | 1158.9812 | 73.3578   |
| 49 | 1160.5532 | 100.5016  |
| 50 | 1246.5286 | 75.0063   |
| 51 | 1252.9074 | 313.1204  |
| 52 | 1322.3505 | 29.3166   |
| 53 | 1348.9361 | 282.0621  |
| 54 | 1402.6165 | 687.8913  |
| 55 | 1482.9997 | 125.5026  |
| 56 | 1557.4160 | 70.9359   |
| 57 | 1587.0722 | 37.1046   |
| 58 | 1599.0719 | 5.3925    |
| 59 | 1606.4263 | 4.2886    |
| 60 | 1610.3496 | 83.8737   |
| 61 | 1612.9887 | 12.4881   |
| 62 | 1619.8264 | 479.7463  |
| 63 | 1636.8015 | 7.8719    |
| 64 | 1641.0078 | 12.1769   |
| 65 | 1641.4160 | 30.2655   |
| 66 | 1653.6839 | 140.2515  |
| 67 | 1659.5454 | 6.2227    |
| 68 | 1672.3324 | 679.4287  |
| 69 | 1691.4096 | 30.1823   |
| 70 | 1711.5871 | 64.9875   |
| 71 | 2164.7221 | 2879.9464 |

|    |           |           |
|----|-----------|-----------|
| 72 | 2273.9310 | 1613.2594 |
| 73 | 2742.8376 | 1217.2306 |
| 74 | 3089.1724 | 684.8038  |
| 75 | 3171.7338 | 396.7032  |
| 76 | 3174.0409 | 432.3952  |
| 77 | 3294.9890 | 239.1646  |
| 78 | 3304.6376 | 333.2268  |
| 79 | 3331.3157 | 126.6762  |
| 80 | 3446.1307 | 20.7861   |
| 81 | 3452.7511 | 27.8074   |
| 82 | 3454.2225 | 48.0500   |
| 83 | 3468.3117 | 89.8668   |
| 84 | 3469.2529 | 13.7812   |
| 85 | 3489.3779 | 45.6384   |
| 86 | 3513.3548 | 4.8947    |
| 87 | 3516.3744 | 5.2562    |
| 88 | 3517.5814 | 5.6468    |
| 89 | 3524.6106 | 3.5119    |
| 90 | 3527.4723 | 7.2277    |

#### Isomers VI -h

| #  | Frequency | Infrared |
|----|-----------|----------|
| 1  | 21.5965   | 3.3120   |
| 2  | 26.3114   | 0.2500   |
| 3  | 39.0844   | 0.6308   |
| 4  | 41.5041   | 1.4459   |
| 5  | 61.2917   | 2.9844   |
| 6  | 68.3582   | 1.8019   |
| 7  | 75.0570   | 6.2871   |
| 8  | 91.8527   | 3.3119   |
| 9  | 104.2551  | 1.2041   |
| 10 | 117.3706  | 2.5124   |
| 11 | 149.7673  | 14.3712  |
| 12 | 180.3846  | 0.8974   |
| 13 | 182.4763  | 8.1297   |
| 14 | 184.3433  | 7.5135   |
| 15 | 191.0075  | 7.1141   |
| 16 | 197.0145  | 6.6892   |
| 17 | 200.1901  | 42.4391  |
| 18 | 239.9489  | 12.8695  |
| 19 | 242.8614  | 2.9349   |
| 20 | 258.3039  | 132.2949 |
| 21 | 262.1221  | 82.9082  |
| 22 | 266.2279  | 43.7516  |

|    |           |           |
|----|-----------|-----------|
| 23 | 288.1444  | 3.5644    |
| 24 | 299.9851  | 2.9884    |
| 25 | 311.2536  | 10.4119   |
| 26 | 320.8093  | 43.8614   |
| 27 | 369.3628  | 12.6811   |
| 28 | 382.8760  | 31.2919   |
| 29 | 391.2110  | 269.5029  |
| 30 | 396.6798  | 112.7028  |
| 31 | 406.6680  | 71.8855   |
| 32 | 438.8994  | 28.8227   |
| 33 | 455.1805  | 7.5371    |
| 34 | 461.5270  | 70.6424   |
| 35 | 518.8573  | 22.5993   |
| 36 | 524.0195  | 23.0459   |
| 37 | 584.9340  | 45.9870   |
| 38 | 602.6632  | 32.2952   |
| 39 | 637.9838  | 0.7466    |
| 40 | 650.0812  | 16.4909   |
| 41 | 739.2122  | 18.4370   |
| 42 | 758.6801  | 94.4962   |
| 43 | 829.4504  | 4.0264    |
| 44 | 859.7930  | 0.6168    |
| 45 | 1141.4535 | 61.3228   |
| 46 | 1143.2067 | 66.7374   |
| 47 | 1171.9095 | 98.1912   |
| 48 | 1179.9590 | 84.8332   |
| 49 | 1240.9277 | 164.9746  |
| 50 | 1260.0104 | 93.7613   |
| 51 | 1313.0037 | 19.7329   |
| 52 | 1397.7134 | 40.6439   |
| 53 | 1436.1410 | 925.9183  |
| 54 | 1449.2830 | 330.2790  |
| 55 | 1498.6575 | 1526.2560 |
| 56 | 1543.6917 | 155.7550  |
| 57 | 1559.5124 | 20.9987   |
| 58 | 1585.9848 | 67.8591   |
| 59 | 1599.3864 | 4.9435    |
| 60 | 1604.0668 | 12.5129   |
| 61 | 1609.7910 | 2.4754    |
| 62 | 1618.8393 | 16.9580   |
| 63 | 1635.7455 | 34.9693   |
| 64 | 1640.9169 | 52.2405   |
| 65 | 1650.2461 | 23.6761   |
| 66 | 1656.1895 | 9.2454    |

|    |           |           |
|----|-----------|-----------|
| 67 | 1664.3546 | 2.6948    |
| 68 | 1669.5668 | 28.6143   |
| 69 | 1681.3603 | 49.4496   |
| 70 | 1685.4106 | 48.2533   |
| 71 | 2366.1228 | 1253.2705 |
| 72 | 2561.1598 | 995.5413  |
| 73 | 2758.5635 | 998.8758  |
| 74 | 2770.4484 | 1686.4190 |
| 75 | 2808.9132 | 747.0064  |
| 76 | 2969.7628 | 486.7661  |
| 77 | 3069.1922 | 738.1824  |
| 78 | 3079.7736 | 677.9740  |
| 79 | 3253.2852 | 415.1438  |
| 80 | 3277.7281 | 287.5883  |
| 81 | 3440.3525 | 17.1693   |
| 82 | 3442.7324 | 18.4435   |
| 83 | 3447.1825 | 44.9314   |
| 84 | 3447.6027 | 23.7439   |
| 85 | 3505.0657 | 39.5325   |
| 86 | 3506.3366 | 35.2945   |
| 87 | 3509.0053 | 3.4375    |
| 88 | 3509.7564 | 3.0278    |
| 89 | 3510.8423 | 4.3338    |
| 90 | 3512.7721 | 4.6286    |
